# Supplementary material for: Predicting disease occurrence of cabbage Verticillium wilt in monoculture using species distribution modeling
Source: PubMed Central journal article supplement (PMC7678443; doi:10.7717/peerj.10290), 2020-11-17

138°27'0"E

138°32'30"E

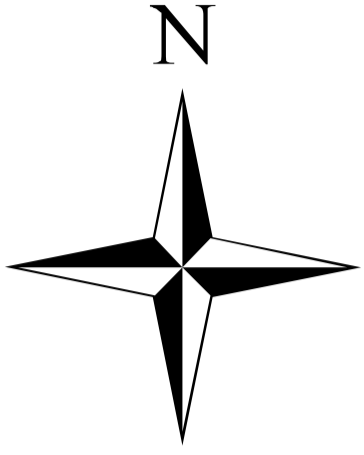

36°35'30"N

36°30'0"N

36°24'30"N

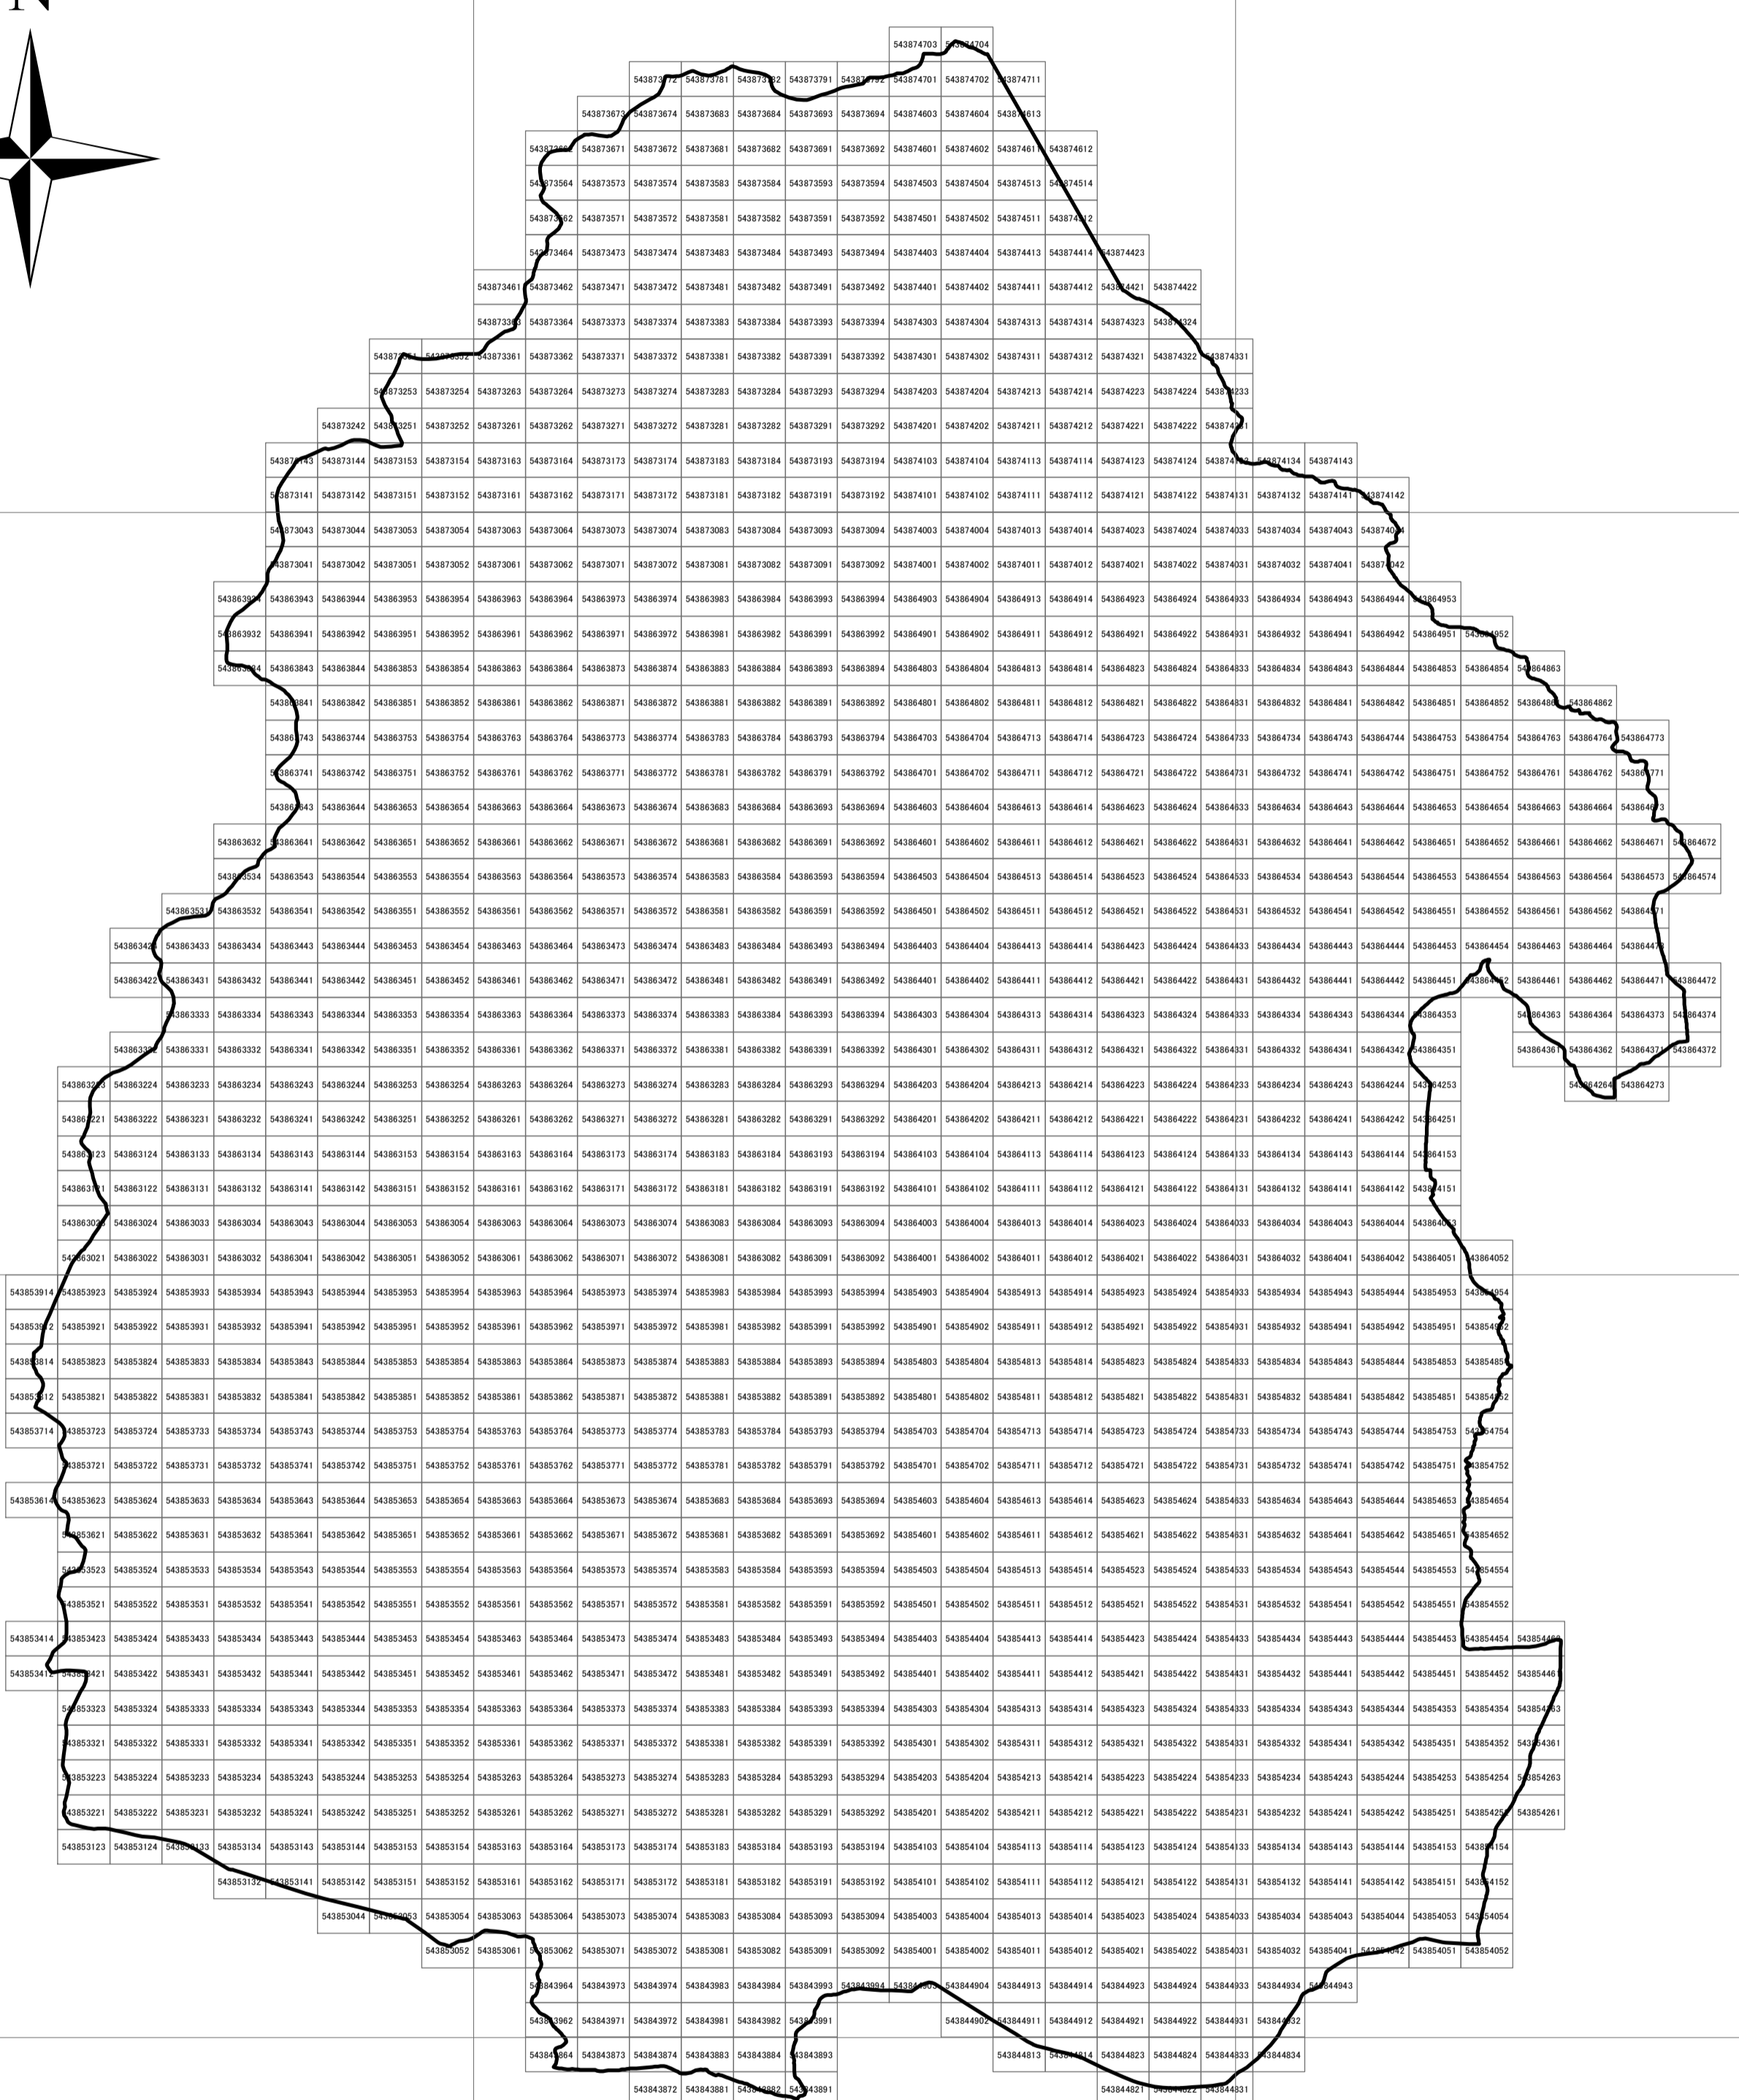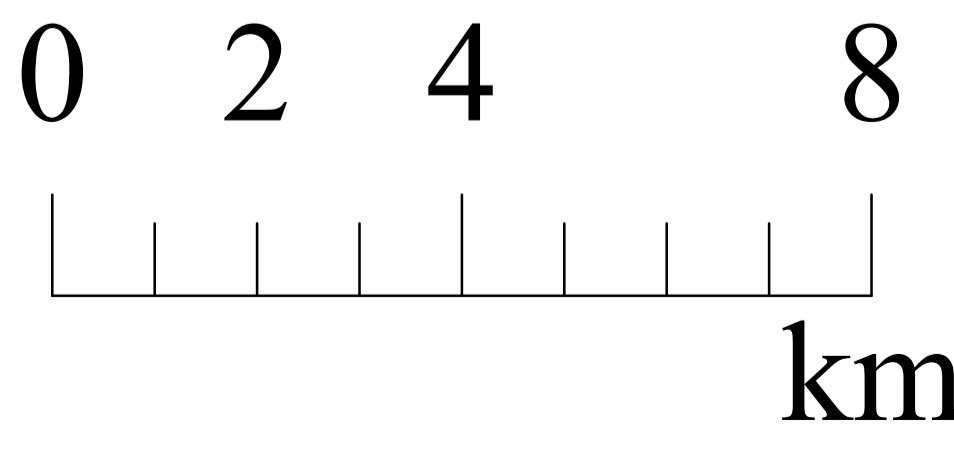

Supplement: peerj-08-10290-s003.pdf [file peerj-08-10290-s003.pdf]
