# Supplementary material for: Predicting disease occurrence of cabbage Verticillium wilt in monoculture using species distribution modeling
Source: PeerJ. 2020 Nov 17;8:e10290. doi: 10.7717/peerj.10290 (PMC7678443; doi:10.7717/peerj.10290)
Supplement: Supplemental Information 1 [file peerj-08-10290-s001.xlsx]

## Sheet: maxentResults
Species	#Training samples	Regularized training gain	Unregularized training gain	Iterations	Training AUC	#Test samples	Test gain	Test AUC	AUC Standard Deviation	#Background points	elev contribution	road contribution	twi contribution	elev permutation importance	road permutation importance	twi permutation importance	Training gain without elev	Training gain without road	Training gain without twi	Training gain with only elev	Training gain with only road	Training gain with only twi	Test gain without elev	Test gain without road	Test gain without twi	Test gain with only elev	Test gain with only road	Test gain with only twi	AUC without elev	AUC without road	AUC without twi	AUC with only elev	AUC with only road	AUC with only twi	Entropy	Prevalence (average probability of presence over background sites)	Fixed cumulative value 1 cumulative threshold	Fixed cumulative value 1 Logistic threshold	Fixed cumulative value 1 area	Fixed cumulative value 1 training omission	Fixed cumulative value 1 test omission	Fixed cumulative value 1 binomial probability	Fixed cumulative value 5 cumulative threshold	Fixed cumulative value 5 Logistic threshold	Fixed cumulative value 5 area	Fixed cumulative value 5 training omission	Fixed cumulative value 5 test omission	Fixed cumulative value 5 binomial probability	Fixed cumulative value 10 cumulative threshold
1_0	188	0.0443	0.0719	100	0.8658	10	0.3034	0.7646	0.0475	2257	1.1855	95.183	3.6315	0	92.0636	7.9364	0.0436	0.0098	0.0421	0.0007	0.0415	0.009	0.3554	0.0021	0.2869	-0.0641	0.337	0.0641	0.7896	0.5556	0.7339	0.2857	0.7639	0.6655	7.6267	0.4547	1	0.3371	0.9805	0	0	0.8213	5	0.3546	0.9114	0	0	0.3954	10
1_1	188	0.038	0.0627	100	0.8604	10	0.3997	0.8349	0.0379	2257	0.8971	98.3145	0.7884	0	95.8194	4.1806	0.0376	0.0058	0.0374	0.0004	0.0371	0.0054	0.4297	0.0727	0.3696	-0.0413	0.3998	0.112	0.8412	0.6911	0.8202	0.3101	0.8263	0.7628	7.6419	0.4617	1	0.364	0.9823	0	0	0.8363	5	0.3749	0.9194	0	0	0.4314	10
1_2	188	0.0425	0.0688	100	0.8701	10	0.3572	0.7979	0.044	2257	0.2915	97.1112	2.5973	0	92.7893	7.2107	0.0423	0.008	0.041	0.0002	0.0409	0.0078	0.3716	0.0623	0.3318	-0.0216	0.345	0.0826	0.8042	0.6491	0.7927	0.3562	0.7957	0.6859	7.6251	0.454	1	0.3524	0.9818	0	0	0.8325	5	0.3623	0.9167	0	0	0.4191	10
1_3	188	0.0305	0.0529	100	0.8582	10	0.5006	0.9118	0.0279	2257	0.2297	99.3319	0.4384	0	97.1646	2.8354	0.0304	0.0032	0.0303	0.0001	0.0302	0.003	0.5118	0.1076	0.4794	-0.0174	0.4908	0.1239	0.9132	0.8511	0.9025	0.3548	0.9038	0.8551	7.6574	0.4689	1	0.3922	0.9836	0	0	0.8476	5	0.3972	0.926	0	0	0.4636	10
1_4	188	0.0373	0.0627	100	0.8662	10	0.4316	0.8542	0.0429	2257	0.2696	98.639	1.0914	0	94.1865	5.8135	0.0372	0.0053	0.0366	0.0001	0.0365	0.0052	0.4447	0.0957	0.4013	-0.0194	0.4139	0.1139	0.8538	0.7701	0.8498	0.351	0.8523	0.7856	7.6384	0.4601	1	0.3695	0.9823	0	0	0.8363	5	0.3769	0.9207	0	0	0.4377	10
1_5	188	0.0302	0.0551	100	0.8629	10	0.5107	0.916	0.0266	2257	0.0004	98.6767	1.3229	0	93.3173	6.6827	0.0301	0.0039	0.0295	0.0002	0.0293	0.0037	0.5282	0.1022	0.4794	-0.0222	0.4966	0.123	0.917	0.7961	0.9056	0.344	0.9079	0.8143	7.6558	0.4682	1	0.3821	0.9818	0	0	0.8325	5	0.3908	0.9225	0	0	0.4462	10
1_6	188	0.0314	0.0551	100	0.8645	10	0.5063	0.901	0.0218	2257	0.4487	97.1355	2.4158	0	92.2903	7.7097	0.0313	0.0053	0.0303	0.0002	0.0302	0.0052	0.5229	0.0932	0.476	-0.0224	0.492	0.1142	0.9012	0.7715	0.8993	0.3498	0.8958	0.7859	7.6536	0.4671	1	0.3778	0.9827	0	0	0.84	5	0.3872	0.9225	0	0	0.4462	10
1_7	188	0.0366	0.0617	100	0.8594	10	0.4101	0.8399	0.0307	2257	1.6586	95.2287	3.1128	0	92.7622	7.2378	0.0358	0.0078	0.035	0.0008	0.0343	0.0069	0.4669	0.0289	0.384	-0.0687	0.4399	0.0953	0.8583	0.5872	0.8322	0.2773	0.8507	0.7248	7.6472	0.4641	1	0.3544	0.9814	0	0	0.8287	5	0.3711	0.9163	0	0	0.4171	10
1_8	188	0.0426	0.0698	100	0.8711	10	0.3591	0.8006	0.0457	2257	0.3871	94.5748	5.0381	0	90.3359	9.6641	0.0424	0.0093	0.0401	0.0002	0.04	0.0091	0.376	0.0404	0.3479	-0.023	0.3629	0.0622	0.806	0.6141	0.7683	0.3429	0.7866	0.6527	7.6235	0.4532	1	0.3456	0.9809	0	0	0.825	5	0.3574	0.9145	0	0	0.4091	10
1_9	188	0.0294	0.0533	100	0.8591	10	0.5047	0.9198	0.0149	2257	1.3162	93.5645	5.1192	0	88.5702	11.4298	0.0288	0.0063	0.0275	0.0005	0.027	0.0058	0.5476	0.0606	0.4815	-0.05	0.5234	0.1084	0.9273	0.6851	0.9327	0.3087	0.9394	0.7734	7.6614	0.4708	1	0.3713	0.9814	0	0	0.8287	5	0.3863	0.9198	0	0	0.4335	10
1_10	188	0.0305	0.053	100	0.8569	10	0.4947	0.9057	0.0191	2257	0.7043	98.1915	1.1042	0	95.0146	4.9854	0.0302	0.0048	0.03	0.0004	0.0296	0.0044	0.5255	0.0817	0.4639	-0.0403	0.4949	0.12	0.9079	0.7525	0.8939	0.3103	0.8951	0.8062	7.6599	0.4701	1	0.3798	0.9832	0	0	0.8438	5	0.3903	0.9229	0	0	0.4483	10
1_11	188	0.0378	0.0647	100	0.8691	10	0.4316	0.8363	0.0547	2257	0.2679	97.7757	1.9564	0	92.8598	7.1402	0.0377	0.0057	0.0367	0.0001	0.0366	0.0055	0.4447	0.094	0.4022	-0.018	0.4146	0.1108	0.8439	0.7446	0.8009	0.3558	0.8173	0.7653	7.6352	0.4586	1	0.3634	0.9814	0	0	0.8287	5	0.3725	0.9185	0	0	0.4272	10
1_12	188	0.0364	0.0605	100	0.8678	10	0.4452	0.8511	0.0369	2257	0.0138	99.4321	0.554	0	95.1977	4.8023	0.0364	0.0048	0.036	0	0.036	0.0048	0.4472	0.1122	0.4169	-0.0057	0.4184	0.1175	0.851	0.7599	0.8374	0.3852	0.8368	0.7655	7.6386	0.4602	1	0.377	0.9832	0	0	0.8438	5	0.381	0.9229	0	0	0.4483	10
1_13	188	0.0326	0.0589	100	0.8696	10	0.4947	0.8772	0.0221	2257	0.0216	97.6784	2.3001	0	90.879	9.121	0.0326	0.0043	0.0314	0	0.0314	0.0043	0.4974	0.1171	0.4655	-0.0029	0.4671	0.1203	0.8769	0.7932	0.8745	0.3927	0.8754	0.7942	7.6447	0.463	1	0.3751	0.9809	0	0	0.825	5	0.3816	0.9202	0	0	0.4356	10
1_14	188	0.0346	0.0577	100	0.8595	10	0.4445	0.8593	0.0262	2257	0.8539	98.2805	0.8656	0	95.4585	4.5415	0.0343	0.0055	0.034	0.0004	0.0337	0.0051	0.4721	0.0785	0.4143	-0.038	0.4419	0.1146	0.864	0.7206	0.8468	0.3129	0.8501	0.7702	7.6505	0.4657	1	0.3729	0.9832	0	0	0.8438	5	0.3828	0.9216	0	0	0.4419	10
1_15	188	0.0398	0.066	100	0.8632	10	0.3822	0.8191	0.0389	2257	0.6165	97.9085	1.475	0	94.2874	5.7126	0.0394	0.0066	0.0388	0.0004	0.0385	0.0061	0.4152	0.0632	0.352	-0.0435	0.3847	0.1047	0.8269	0.6661	0.807	0.3157	0.8167	0.7378	7.6361	0.459	1	0.3566	0.9814	0	0	0.8287	5	0.3682	0.9171	0	0	0.4211	10
1_16	188	0.0321	0.0563	100	0.8697	10	0.5125	0.8889	0.0161	2257	0.0238	94.95	5.0262	0	89.6528	10.3472	0.0321	0.0064	0.0302	0	0.0302	0.0064	0.5151	0.0981	0.4912	-0.0034	0.4923	0.1019	0.8884	0.7584	0.9	0.3918	0.8981	0.7584	7.6464	0.4638	1	0.371	0.9818	0	0	0.8325	5	0.3788	0.9202	0	0	0.4356	10
1_17	188	0.0357	0.0604	100	0.87	10	0.4678	0.8573	0.0542	2257	0.0326	96.8408	3.1267	0	91.5552	8.4448	0.0357	0.0067	0.0342	0	0.0342	0.0066	0.4712	0.0929	0.4422	-0.006	0.4444	0.0986	0.8588	0.7269	0.8285	0.3848	0.8447	0.733	7.6383	0.4601	1	0.3667	0.9823	0	0	0.8363	5	0.3738	0.9198	0	0	0.4335	10
1_18	189	0.0292	0.0522	120	0.8518	9	0.5062	0.9293	0.0153	2257	0.8569	96.8704	2.2728	0	94.5713	5.4287	0.0285	0.0045	0.0286	0.0007	0.028	0.0038	0.5578	0.0664	0.4741	-0.0622	0.5263	0.1262	0.9442	0.7161	0.9172	0.2803	0.9297	0.8356	7.6643	0.4722	1	0.3754	0.9823	0	0	0.8513	5	0.3909	0.9216	0	0	0.4795	10
1_19	189	0.0366	0.0633	100	0.871	9	0.4512	0.8446	0.0272	2257	0.0581	97.19	2.7519	0.0505	91.2675	8.682	0.0366	0.0059	0.0351	0	0.0351	0.0059	0.4558	0.1002	0.4257	-0.0068	0.4294	0.1066	0.8442	0.7644	0.8411	0.3868	0.8395	0.7684	7.6351	0.4585	1	0.3639	0.9814	0	0	0.8445	5	0.3718	0.9185	0	0	0.4652	10
1 (average)	188.1	0.0354	0.0603	101	0.8643	9.9	0.4457	0.8605	0.0325	2257	0.5067	97.1439	2.3494	0.0025	93.0022	6.9953	0.0351	0.006	0.0342	0.0003	0.034	0.0057	0.4678	0.0785	0.4193	-0.0288	0.4408	0.106	0.8659	0.7187	0.8492	0.3398	0.8563	0.762	7.644	0.4627	1	0.3674	0.982	0	0	0.8354	5	0.3775	0.9197	0	0	0.4368	10
[truncated: 53 more columns]

## Sheet: All data
mesh_code	elevation	Road	Disease_occurrence	Disease_Potential	TWI
543843864	1970.2	1095.23		0.509037	5.50803
543843872	1909.7	0		0.398204	5.62461
543843873	1978.1	1704.04		0.569874	6.08616
543843874	1967	3025.4		0.635871	6.47411
543843881	2047.1	229.17		0.428607	5.6285
543843882	2199.9	1220.94		0.532495	5.73072
543843883	2056.3	1276.21		0.542527	6.13176
543843884	2236.5	0		0.408454	5.63667
543843891	2200.4	1020.46		0.503386	5.25397
543843893	2235.5	0		0.402234	5.3897
543843962	1919.6	1583.24		0.557833	6.00038
543843964	1970.6	492.68		0.460868	5.8773
543843971	1890.9	2432.27		0.629436	7.07926
543843972	1919	2111.92		0.608168	6.76068
543843973	1878.1	2485.67		0.620745	6.63759
543843974	1880.4	989.362		0.526179	6.6649
543843981	2026.9	0		0.412111	6.0528
543843982	2211.7	0		0.409497	5.71013
543843983	1984.6	0		0.411298	6.0728
543843984	2170.6	0		0.409443	5.75987
543843991	2278.3	0		0.409937	5.65278
543843993	2268.8	0		0.409634	5.64815
543843994	2230.4	0		0.398655	5.24509
543844813	2461.7	191.842		0.44277	5.84832
543844814	2479.1	414.169		0.459015	5.48618
543844821	2317.4	234.881		0.432468	5.4234
543844822	2192.9	1140.95		0.528112	5.8329
543844823	2374.1	1325.25		0.546589	5.74994
543844824	2096.7	0		0.405271	5.68711
543844831	2043.6	616.161		0.476671	5.91308
543844833	1929.5	0		0.400736	5.70852
543844834	1835.2	0		0.403684	5.95253
543844902	2227.5	0		0.410484	5.72889
543844903	2184.7	0		0.401207	5.40991
543844904	2112.3	0		0.415336	6.07912
543844911	2380.7	1094.03		0.521977	5.5072
543844912	2395.8	0		0.407961	5.41945
543844913	2142.7	0		0.40503	5.61561
543844914	2141.3	0		0.405151	5.62256
543844921	2287.5	0		0.402452	5.3297
543844922	2022.6	0		0.400128	5.57371
543844923	2064.6	0		0.399593	5.49254
543844924	1910.8	0		0.397575	5.60458
543844931	1798.7	0		0.408247	6.18646
543844932	1712.6	0		0.402592	6.05959
543844933	1734.1	0		0.402815	6.04586
543844934	1622.2	0		0.412124	6.56706
543844943	1552.2	0		0.407363	6.45892
543853044	1881.9	0		0.403243	5.87273
543853052	2131.1	1138.1		0.515895	5.43051
543853053	2101	356.961		0.436113	5.30095
543853054	2026.3	169.18		0.416214	5.42514
543853061	2027.4	435.201		0.446217	5.45742
543853062	2064.2	1207.55		0.522285	5.5364
543853063	2045.2	782.176		0.477829	5.30342
543853064	2046.1	0		0.39721	5.41533
543853071	1890.9	5.821		0.409223	6.07687
543853072	1838.6	983.967		0.524935	6.68744
543853073	1881.4	0		0.401215	5.78797
543853074	1760.1	1049.57		0.507271	5.85617
543853081	1914	458.628		0.458002	5.9769
543853082	2031.1	0		0.403786	5.70496
543853083	1801.5	2054.58		0.583187	6.00487
543853084	1852.4	0		0.395405	5.58896
543853091	2064.8	0		0.399707	5.49373
543853092	2027.1	0		0.395731	5.37481
543853093	1836.9	0		0.387921	5.29163
543853094	1820.9	0		0.387747	5.3061
543853123	1923.9	0		0.394531	5.45636
543853124	1837.2	151.451		0.434245	6.47793
543853132	1733.9	182.766		0.45186	7.17273
543853133	1817.3	0		0.411727	6.30289
543853134	1699	2191.55		0.599147	6.49723
543853141	1743.5	0		0.414164	6.49475
543853142	1805.3	0		0.405398	6.0586
543853143	1681.5	237.576		0.452431	7.01219
543853144	1740.8	1397.56		0.552162	6.53648
543853151	1962.7	0		0.392933	5.34365
543853152	1850.1	0		0.395284	5.57816
543853153	1795.6	0		0.403632	5.99729
543853154	1727.3	0		0.398183	5.85554
543853161	1819.7	0		0.390828	5.43254
543853162	1911.8	0		0.390276	5.29589
543853163	1669.7	0		0.401678	6.07422
543853164	1721.8	0		0.388968	5.4818
543853171	1858.4	0		0.398187	5.69323
543853172	1659	385.913		0.432216	5.57265
543853173	1670.5	0		0.386135	5.42568
543853174	1550.8	1171.03		0.50813	5.73884
543853181	1660.2	3613.31		0.617039	5.72777
543853182	1635.1	848.805		0.482541	5.75455
543853183	1529.8	1434.49		0.549706	6.59213
543853184	1523.8	1044.73		0.52152	6.7332
543853191	1644.8	0		0.390785	5.65312
543853192	1664.8	0		0.397746	5.91677
543853193	1538	1142.51		0.522839	6.43203
543853194	1572.4	1419.41		0.539571	6.17721
543853221	2008.8	621.186		0.471059	5.71108
543853222	1841.6	846.826		0.499194	6.16235
543853223	1974.3	950.522		0.495145	5.45536
543853224	1746.3	0		0.401972	5.98672
543853231	1762.8	930.885		0.49609	5.82802
543853232	1636.1	4008.98		0.63133	6.38209
543853233	1675.8	2691.46		0.60653	5.98699
543853234	1651.7	1561.66		0.538563	5.62457
543853241	1681.1	3223.02		0.627644	6.31834
543853242	1785	415.82		0.441178	5.64796
543853243	1798.7	2356.28		0.586564	5.54207
543853244	1694	0		0.395352	5.7789
543853251	1697.5	1198.59		0.532114	6.41687
543853252	1647.6	41.241		0.408324	6.17946
543853253	1627.1	2777.65		0.608544	6.01804
543853254	1551.8	2258.63		0.595205	6.38735
543853261	1589.3	0		0.412103	6.60421
543853262	1574.2	0		0.395867	5.95402
543853263	1535.4	0		0.408534	6.52596
543853264	1517	0		0.40566	6.43144
543853271	1497.9	671.129		0.466497	5.96882
543853272	1457.4	788.875		0.493519	6.63788
543853273	1439.8	1011.93		0.512404	6.59135
543853274	1402.3	948.212	1	0.51338	6.90582
543853281	1469.3	0		0.422908	7.19711
543853282	1458.7	1330.39		0.53453	6.39241
543853283	1403.3	1606.24	1	0.557857	6.5866
543853284	1388.1	1212.6		0.533904	6.8311
543853291	1483.2	576.164		0.470863	6.54296
543853292	1493.9	390.764		0.448238	6.4035
543853293	1432.3	840.675		0.500939	6.76889
543853294	1428	1663.88		0.568703	6.83345
543853321	1854	929.392		0.494603	5.66
543853322	1702.8	1490.92		0.555123	6.42352
543853323	1802.9	2203.59		0.585632	5.78776
543853324	1745.8	542.834		0.45821	5.84291
543853331	1597.6	3030.42		0.616703	6.11561
543853332	1660.9	457.03		0.437383	5.4774
543853333	1620.7	1284.02		0.52166	5.81943
543853334	1538.4	1651.84		0.548142	5.89904
543853341	1829.6	366.189		0.432289	5.44831
543853342	1684.9	0		0.38616	5.40732
543853343	1572.2	257.549		0.417615	5.65365
543853344	1533.1	0		0.393867	5.92159
543853351	1566.4	1142.46		0.519682	6.2718
543853352	1494.7	838.696		0.514095	7.21778
543853353	1533.8	0		0.401865	6.25238
543853354	1516.3	0		0.403575	6.34433
543853361	1478.8	978.665		0.518212	6.89108
543853362	1450.4	0		0.407868	6.60515
543853363	1436	1097.73	1	0.521863	6.67296
543853364	1398.4	3163.93	1	0.632792	6.93423
543853371	1397.8	1095.99		0.517802	6.56708
543853372	1352.9	925.408	1	0.520921	7.34973
543853373	1356.7	1382.73		0.550335	6.98961
543853374	1320.3	360.955	1	0.464296	7.39431
543853381	1358.2	4262.35	1	0.638435	7.15925
543853382	1350.5	3508.84	1	0.638587	7.0546
543853383	1323	4715.93	1	0.628836	7.21473
543853384	1316.5	4248.34	1	0.633473	6.98656
543853391	1380.3	2556.15	1	0.617636	7.01909
543853392	1374.8	2638.41		0.617608	6.90063
543853393	1336.8	1945.85	1	0.587185	6.99275
543853394	1332.6	1966.59	1	0.591312	7.11943
543853412	1742.4	0		0.386517	5.35471
543853414	1675.2	0		0.387947	5.49623
543853421	1860.5	422.71		0.442073	5.55983
543853422	1875.4	1702.28		0.552319	5.51043
543853423	1741.7	0		0.397601	5.81514
543853424	1824.9	0		0.391694	5.46542
543853431	1719.9	1187.31		0.51017	5.55029
543853432	1597.9	403.517		0.432294	5.57407
543853433	1748.7	2581.78		0.600113	5.78839
543853434	1624.5	0		0.389132	5.60713
543853441	1464.4	3299.87		0.611607	5.86435
543853442	1456.5	530.347		0.458784	6.2834
543853443	1471.9	617.011		0.458399	5.89172
543853444	1391.9	3350.06		0.623332	6.41965
543853451	1566.4	1249.79		0.522124	6.01981
543853452	1648.4	951.645		0.494058	5.81636
543853453	1494.5	0		0.387647	5.71463
543853454	1662	223.846		0.416464	5.64938
543853461	1468	137.521		0.403095	5.73395
543853462	1354.7	2606.25	1	0.616727	6.93602
543853463	1475.8	0		0.380363	5.42625
543853464	1317.7	648.537		0.481645	6.88714
543853471	1325.4	1380.58	1	0.551072	7.06563
543853472	1295.9	1523.37	1	0.566977	7.32218
543853473	1292.8	2251.49		0.604173	7.09769
543853474	1264.5	2405.41	1	0.602455	6.78084
543853481	1288.9	2958.97	1	0.635735	7.38672
543853482	1279.5	5959.31	1	0.558266	6.86376
543853483	1249.3	3362.68	1	0.628048	6.79505
543853484	1239.7	4040.43	1	0.639771	7.25369
543853491	1282.2	870.875	1	0.50205	6.88837
543853492	1296.1	1478.09		0.558157	7.09601
543853493	1247.7	3485.03	1	0.642167	7.34726
543853494	1261.2	3887.12		0.639965	7.19509
543853521	1662.6	0		0.394668	5.79179
543853522	1701.4	0		0.392204	5.64134
543853523	1613.3	0		0.390792	5.69165
543853524	1573.7	0		0.394794	5.91066
543853531	1668.3	858.474		0.479908	5.56936
543853532	1685.8	1530.95		0.530525	5.34937
543853533	1559.2	0		0.393507	5.87473
543853534	1556.9	11.901		0.390032	5.67535
543853541	1481.1	607.95		0.459484	5.96198
543853542	1362.8	2189.24		0.588311	6.47682
543853543	1447.4	676.499		0.471431	6.20736
543853544	1363.7	1786.41		0.556094	6.08557
543853551	1371.9	319.544		0.433379	6.26999
543853552	1471.1	0		0.384194	5.59709
543853553	1305	2544.7		0.605427	6.61951
543853554	1355.9	0		0.397359	6.28989
543853561	1362.4	0		0.392183	6.06609
543853562	1274.5	1921.21		0.586311	7.09251
543853563	1306.7	648.71		0.478918	6.79179
543853564	1243.5	2893.28		0.627416	7.15421
543853571	1257.3	1666.81		0.570761	7.12408
543853572	1232.2	2921.53	1	0.623837	6.98787
543853573	1218.4	2982.09	1	0.629148	7.16593
543853574	1198.9	2808.87	1	0.619483	6.97414
543853581	1212.6	1561.19		0.556574	6.90005
543853582	1206.9	3737.86	1	0.639961	7.25429
543853583	1184.7	3346.18	1	0.64178	7.4715
543853584	1178.3	3558.54	1	0.639338	7.28847
543853591	1217.7	3646.02	1	0.637459	7.13966
543853592	1231.1	5435.01	1	0.607671	7.6435
543853593	1189.4	3230.63	1	0.635576	7.26551
543853594	1205.8	5412.44	1	0.605195	7.52274
543853614	1465.5	0		0.386586	5.70368
543853621	1565.3	769.191		0.480147	6.0473
543853622	1494.6	580.902		0.464262	6.24507
543853623	1514.5	0		0.402254	6.29317
543853624	1467.7	1021.04		0.503628	6.17676
543853631	1469.1	0		0.403536	6.40417
543853632	1440.5	243.671		0.42662	6.24806
543853633	1401.5	2713.67		0.614479	6.63148
543853634	1368.8	4215.92	1	0.627519	6.64747
543853641	1394.4	1050.87		0.512586	6.51927
543853642	1340.7	1354.18	1	0.528782	6.23628
543853643	1329.7	4579.62	1	0.622528	6.78085
543853644	1303.8	2262.67	1	0.592785	6.59113
543853651	1277.6	3137.55	1	0.622413	6.66538
543853652	1295.8	296.535		0.440463	6.75277
543853653	1249.8	2979.68		0.621736	6.81464
543853654	1248.1	417.073	1	0.4606	7.09428
543853661	1280.7	2326.32		0.618484	7.5682
543853662	1258	1758.92		0.569808	6.84062
543853663	1261	3894.81		0.639434	7.17251
543853664	1288.2	1285.7	1	0.518953	6.12662
543853671	1192.7	3545	1	0.638826	7.25105
543853672	1167.1	1087.39	1	0.51692	6.85125
543853673	1202.2	2513.63	1	0.603736	6.72869
543853674	1146.8	1590.47	1	0.548757	6.58414
543853681	1167.8	2844.85	1	0.626724	7.27646
543853682	1152.4	1684.22		0.571856	7.25264
543853683	1136.1	2976.25		0.629409	7.28614
543853684	1127	2214.88		0.600229	7.21248
543853691	1155.8	3773.28		0.637337	7.20177
543853692	1164.3	3250.87		0.621938	6.70399
543853693	1124.4	3298.46	1	0.638874	7.44658
543853694	1114.4	2526.49	1	0.620734	7.52857
543853714	1386.9	0		0.387534	5.8422
543853721	1471.5	0		0.404158	6.42612
543853722	1408.8	1022.68		0.50585	6.33168
543853723	1430.9	211.655		0.440033	6.94643
543853724	1382.9	2878.58	1	0.618944	6.6374
543853731	1360.7	4945.79	1	0.611151	6.73149
543853732	1317.8	4152.81	1	0.632455	6.88681
543853733	1324.7	2158.62	1	0.588285	6.58568
543853734	1301.8	3310.82	1	0.636041	7.09543
543853741	1276.2	4511.72	1	0.626588	6.95133
543853742	1249.1	3760.33	1	0.632466	6.87759
543853743	1264.3	2445.11	1	0.612502	7.12794
543853744	1220.2	3429.27	1	0.641436	7.37011
543853751	1220.1	3844.72	1	0.638894	7.19351
543853752	1205.6	3015.5	1	0.634646	7.38402
543853753	1191.2	4113.62	1	0.6412	7.40289
543853754	1175.3	2613.9		0.624253	7.4675
543853761	1218.9	3006.84	1	0.626388	7.02371
543853762	1227	1800.64	1	0.553901	6.1335
543853763	1170.8	2033.96	1	0.591274	7.16833
543853764	1169.3	3094.72	1	0.624033	6.90549
543853771	1183.7	3843.92	1	0.638012	7.20115
543853772	1154.2	2425.41	1	0.590607	6.3927
543853773	1150.8	2969.06	1	0.625756	7.11971
543853774	1154.3	3133.5	1	0.625741	6.96541
543853781	1125.9	1942.6		0.576103	6.81382
543853782	1103.1	2927.55	1	0.625702	7.221
543853783	1104.7	884.751		0.472905	5.90102
543853784	1082.9	2910.71		0.608891	6.55779
543853791	1100	2874.74		0.624582	7.23503
543853792	1087.4	2611.96	1	0.619413	7.37642
543853793	1074.2	3339.95	1	0.63122	7.15921
543853794	1061.9	3794.99		0.640081	7.4401
543853812	1381.5	1010.17		0.501787	6.25112
543853814	1355	2310.32	1	0.597171	6.61733
543853821	1397.4	4491.95	1	0.633535	7.07713
543853822	1357.5	3826.08	1	0.62811	6.55869
543853823	1363.7	3975.95	1	0.633406	6.80255
543853824	1331.6	2339.82		0.595859	6.53725
543853831	1317.8	4229.09	1	0.626491	6.67639
543853832	1267.5	3048.13	1	0.621993	6.73729
543853833	1297.4	1129.76		0.522044	6.7459
543853834	1284.4	2769.02		0.61034	6.53183
543853841	1236.2	3399.41	1	0.62479	6.65176
543853842	1202.7	3271	1	0.629631	6.96964
543853843	1274.9	2200.91	1	0.589651	6.6184
543853844	1233.6	1535.23		0.545002	6.47965
543853851	1172.5	3107.95	1	0.640544	7.59593
543853852	1154.6	3626.26	1	0.64575	7.58042
543853853	1195.1	2069.54		0.581342	6.65261
543853854	1163	3858.27		0.629293	6.8553
543853861	1138.8	3080.52	1	0.634035	7.38222
543853862	1121.4	4840.68		0.615473	7.06059
543853863	1131.2	3340.45		0.64255	7.57359
543853864	1117.7	4292.79		0.642656	7.65919
543853871	1099	2928.11		0.615004	6.77366
543853872	1095.6	3094.4		0.627898	7.1612
543853873	1124.6	1996.31		0.586722	7.12414
543853874	1116.5	47.623		0.482765	9.80895
543853881	1082.2	2069.24		0.556493	5.79005
543853882	1047	2265.61		0.566826	5.84985
543853883	1146.3	3341.45	1	0.625496	6.82418
543853884	1095.1	691.921		0.45169	5.79837
543853891	1046	2679.15	1	0.60962	6.92189
543853892	1037.7	3294.23		0.636401	7.45284
543853893	1003.5	1576.35		0.545881	6.68823
543853894	1015.5	3743.55	1	0.638409	7.42607
543853912	1359.3	1561.1		0.552735	6.55911
543853914	1362.5	312.134		0.431602	6.24156
543853921	1388	399.61		0.473425	7.5042
543853922	1360.4	0		0.413465	6.94728
543853923	1409.3	2341.86		0.613317	7.16157
543853924	1407.2	1166.86		0.526182	6.64909
543853931	1342.9	168.569		0.42691	6.72333
543853932	1336.2	1784.72		0.568786	6.63578
543853933	1410.7	2179.15		0.590632	6.53295
543853934	1386.7	2882.45		0.612518	6.35846
543853941	1332.4	1254.33	1	0.531802	6.68065
543853942	1292.7	3092.14	1	0.622297	6.67907
543853943	1404.6	919.284		0.495321	6.2899
543853944	1336.8	2963.34		0.62041	6.66586
543853951	1243.5	3748.7	1	0.633293	6.91919
543853952	1209.3	1383.76		0.532501	6.45797
543853953	1296.4	2319.77	1	0.598994	6.7481
543853954	1250.9	3049.48		0.616751	6.53642
543853961	1151.2	393.179	1	0.448069	6.81536
543853962	1138.2	4110.28	1	0.634238	7.16862
543853963	1184.4	3952.61	1	0.63322	7.01312
543853964	1172.3	3775.19		0.629778	6.85881
543853971	1135.2	2155.12	1	0.605228	7.53096
543853972	1119.2	0		0.466349	9.37967
543853973	1144.7	2083.48	1	0.586099	6.88063
543853974	1129.9	3282.59	1	0.642657	7.61315
543853981	1146.1	2973.51	1	0.623005	7.00515
543853982	1129.3	0		0.380062	5.85206
543853983	1143.6	2464.23		0.601678	6.79755
543853984	1112.1	1912.7		0.54463	5.63239
543853991	994.3	1934.43		0.559257	6.31473
543853992	984.5	2246.22		0.586983	6.78637
543853993	1061	863.493		0.460562	5.54108
543853994	952.8	3125.07		0.615738	6.8026
543854001	2016.5	0		0.395642	5.38608
543854002	1985.4	0		0.405787	5.84769
543854003	1826.5	484.892		0.446254	5.50573
543854004	1859.7	0		0.396875	5.63587
543854011	1966.8	0		0.417383	6.34643
543854012	1944.7	0		0.414134	6.24007
543854013	1838.8	0		0.40132	5.84623
543854014	1813.7	0		0.407943	6.15087
543854021	1883	0		0.404552	5.92622
543854022	1763.5	0		0.400386	5.90434
543854023	1786.9	0		0.414029	6.43396
543854024	1701.3	0		0.409672	6.36274
543854031	1657.1	0		0.403285	6.15844
543854032	1561.6	0		0.402086	6.23045
543854033	1602.9	0		0.409964	6.50208
543854034	1502.6	0		0.415512	6.85488
543854041	1493.5	0		0.414613	6.82799
543854042	1440.9	0		0.416788	6.97907
543854043	1446.8	0		0.427504	7.41111
543854044	1411.6	756.711		0.504372	7.24593
543854051	1399.8	172.572		0.443309	7.29223
543854052	1366.8	285.092		0.464768	7.68629
543854053	1385.9	355.636		0.460231	7.17037
543854054	1362.4	941.927		0.537299	7.93053
543854101	1670.8	1416.55		0.525696	5.51007
543854102	1698.1	0		0.392179	5.64308
543854103	1560.1	2421.18		0.589022	5.82673
543854104	1566.9	2623.91		0.596055	5.78505
543854111	1661.8	713.899		0.46942	5.71183
543854112	1664	0		0.412034	6.5077
543854113	1567.3	159.597		0.431058	6.65085
543854114	1586.8	0		0.420025	6.93082
543854121	1679	0		0.398681	5.93812
543854122	1618.9	171.356		0.429552	6.47034
543854123	1570	0		0.40223	6.22213
543854124	1525.2	1488.97		0.553706	6.59636
543854131	1572.2	0		0.410158	6.5467
543854132	1475.4	0		0.419581	7.05249
543854133	1505.8	319.663		0.435111	6.17075
543854134	1445.6	0		0.410379	6.71422
543854141	1427.3	0		0.419838	7.12326
543854142	1388.4	1113.01		0.535955	7.24251
543854143	1394.4	970.064		0.522497	7.19745
543854144	1356.8	145.003		0.440368	7.35805
543854151	1353.5	0		0.425704	7.45392
543854152	1333.5	947.579		0.524684	7.44097
543854153	1332.1	3189.5		0.642948	7.43472
543854154	1309.8	4899.21		0.630693	7.55051
543854201	1476.7	2490.11		0.599881	6.26201
543854202	1458.7	2219.29		0.580152	5.9647
543854203	1410.1	883.344		0.497639	6.50553
543854204	1385	2101.24		0.579747	6.28247
543854211	1499	0		0.398572	6.16029
543854212	1514.7	0		0.410749	6.64193
543854213	1412.2	1043.8		0.511469	6.47758
543854214	1444.7	0		0.416835	6.97952
543854221	1477.7	534.701		0.460978	6.32535
543854222	1441	0		0.410852	6.74007
543854223	1397.6	2306.66		0.599471	6.66499
543854224	1373.6	4377.46		0.632934	6.98302
543854231	1417	1222.92		0.530242	6.61362
543854232	1385.3	1090.92		0.521709	6.75426
543854233	1363.6	2720.83		0.624574	7.09453
543854234	1336	1191.68		0.539971	7.20592
543854241	1350.6	924.075		0.516759	7.18981
543854242	1325.3	73.377		0.43495	7.51369
543854243	1310.3	475.733		0.475507	7.3597
543854244	1295	1923.07		0.593349	7.35053
543854251	1301.3	7527.03		0.425377	7.48856
543854252	1286.2	7236.96		0.45891	7.51979
543854253	1274.3	9472.77		0.185247	7.49272
543854254	1257	9463.17		0.18728	7.58175
543854261	1287.8	136.266		0.420677	6.68887
543854263	1244.4	2394.82		0.613622	7.28699
543854301	1354.9	2207.87		0.596155	6.77245
543854302	1334.8	4296.5		0.627434	6.73775
543854303	1312.6	6061.13	1	0.55951	7.16157
543854304	1287.1	5042.46		0.613705	7.08331
543854311	1348.1	2148.27		0.589646	6.63418
543854312	1390.5	0		0.406569	6.62624
543854313	1290.2	5398.5		0.598065	7.0948
543854314	1320.3	24.537		0.412839	6.85528
543854321	1354.7	1434.61		0.54828	6.75317
543854322	1342.6	4603.67		0.630045	7.10727
543854323	1310.6	407.242		0.453893	6.78871
543854324	1282.4	396.737		0.452541	6.81503
543854331	1322	4371.51		0.63734	7.23019
543854332	1299.9	1158.96		0.542944	7.47865
543854333	1279.2	5470.61		0.594841	7.12738
543854334	1266	1389.85		0.558372	7.40347
543854341	1274.5	969.62		0.526432	7.50522
543854342	1263.8	6735.05		0.510472	7.5333
543854343	1246.7	1341.34		0.566456	7.90349
543854344	1237.7	8610.82		0.288261	7.51651
543854351	1248.9	8852.29		0.258608	7.5398
543854352	1228.5	6066.77		0.570753	7.73733
543854353	1221.7	6668.01		0.519002	7.67402
543854354	1204.9	7481.13		0.433255	7.71175
543854361	1218.2	4326.08		0.644109	7.61947
543854363	1193	4065.83		0.648151	7.68305
543854401	1275.5	2486.41	1	0.614485	7.12928
543854402	1252.5	2793.75		0.62367	7.10252
543854403	1237.6	2622.68		0.615244	6.99772
543854404	1220	694.075		0.491068	7.2047
543854411	1254.7	4934.02		0.626913	7.5132
543854412	1256	3701.56		0.639807	7.18801
543854413	1223.4	6042.19		0.565694	7.46972
543854414	1224.8	4865.22		0.630863	7.6188
543854421	1270	942.698		0.515368	7.17068
543854422	1239.2	1666.33		0.571119	7.16127
543854423	1231.2	695.927		0.493585	7.28485
543854424	1205.7	2764.86		0.629904	7.46195
543854431	1240.6	5966.78		0.567595	7.30568
543854432	1235.4	5679.6		0.591087	7.51229
543854433	1204.4	4869		0.622264	7.28059
543854434	1206.7	4698.6		0.636377	7.65774
543854441	1222.8	6584.04		0.527031	7.68512
543854442	1210.3	8677.54		0.28035	7.57968
543854443	1196.5	7994.85		0.369582	7.68921
543854444	1183.3	7085.87		0.478108	7.76041
543854451	1192.8	6852.94		0.500752	7.6934
543854452	1180.8	5105.52		0.625171	7.80541
543854453	1165.4	6687.89		0.517388	7.75398
543854454	1154.8	575.717		0.490801	7.74833
543854461	1170.4	1924.08		0.602926	7.9021
543854463	1151.4	1250.41		0.556068	7.89219
543854501	1202.6	3572.3	1	0.636857	7.14644
543854502	1188.1	1458.86	1	0.551729	7.02803
543854503	1168.3	3416.39	1	0.631811	7.0264
543854504	1158.8	3431.94	1	0.632643	7.06832
543854511	1193.1	5572.61		0.600276	7.69157
543854512	1198.9	6340.01		0.549893	7.78827
543854513	1167.9	5311.05		0.608929	7.51989
543854514	1176.3	4109.25		0.653856	7.9724
543854521	1187.7	3094.41		0.630364	7.15267
543854522	1178.7	3946.54		0.64506	7.5299
543854523	1160.7	2861.83		0.635994	7.66061
543854524	1158.7	5889.81		0.579033	7.65977
543854531	1170.8	7260.3		0.456856	7.68619
543854532	1178.8	4556.87		0.643816	7.85603
543854533	1146	6991.83		0.488396	7.82035
543854534	1152.1	5507.65		0.600932	7.61923
543854541	1172.8	6627.24		0.523723	7.77272
543854542	1161.2	7044.89		0.482478	7.78852
543854543	1146.4	6047.78		0.569056	7.71453
543854544	1136.1	7795.13		0.393584	7.72312
543854551	1143.1	8413.1		0.315738	7.7406
543854552	1132.3	506.554		0.48978	8.02104
543854553	1120	7946.6		0.376492	7.81908
543854554	1113.3	2436.07		0.630913	8.11046
543854601	1136.2	3175.68	1	0.63038	7.15201
543854602	1131.2	3184.85	1	0.634552	7.33072
543854603	1103.9	2728.49	1	0.622465	7.32172
543854604	1103.4	2748.91	1	0.622704	7.30495
543854611	1143.3	4409.63		0.640206	7.61119
543854612	1156.2	5082.4		0.620696	7.60849
543854613	1124.6	4573.72	1	0.642584	7.88954
543854614	1131	3643.64		0.647102	7.66649
543854621	1147.3	4670.11		0.626373	7.27182
543854622	1138.4	6776.34		0.513598	7.9737
543854623	1136	4486.89		0.639216	7.64513
543854624	1122.9	8965.92		0.245941	7.77853
543854631	1127.5	10246.6		0.114675	8.0523
543854632	1127.1	8731.49		0.269834	7.4971
543854633	1112.5	7862.1		0.390467	7.972
543854634	1104.9	8015.51		0.36862	7.87468
543854641	1119.3	6809.5		0.508305	7.91316
543854642	1111.8	8046.07		0.360812	7.69625
543854643	1096	6233.05		0.552507	7.67273
543854644	1087.5	6381.77		0.547355	7.96099
543854651	1100.9	6227.5		0.559301	7.92368
543854652	1094.5	189.659		0.45148	7.92586
543854653	1082.8	3724.69		0.650775	7.87822
543854654	1079	0		0.42448	7.74793
543854701	1076.7	4828	1	0.624971	7.50002
543854702	1083.8	5603.25		0.589131	7.43935
543854703	1051.8	2898.16		0.627214	7.3816
543854704	1065.4	2470.01		0.618217	7.57689
543854711	1103.1	3484.43		0.644765	7.64121
543854712	1110.7	1417.31		0.562578	7.68591
543854713	1079.9	38.936		0.425979	7.62233
543854714	1090.7	2440.54		0.613776	7.40767
543854721	1115.7	6963.98		0.482036	7.49386
543854722	1114.7	7591.43		0.413895	7.56884
543854723	1092.7	785.44		0.495223	7.17489
543854724	1095	5495.83		0.599212	7.59453
543854731	1101.7	6447.58		0.522554	7.17847
543854732	1090.6	385.94		0.455372	7.21552
543854733	1089.8	7863.02		0.365624	6.9515
543854734	1071.2	3828.72		0.622353	6.67385
543854741	1075.2	6937.36		0.4812	7.40025
543854742	1066.8	1258.53		0.551185	7.77441
543854743	1058.3	4077.71		0.635877	7.32577
543854744	1047.4	2762.74		0.624865	7.44941
543854751	1060	3146.48		0.6349	7.46243
543854752	1060.5	0		0.422102	7.6748
543854753	1043.1	3150.42		0.62606	7.10444
543854754	1043.3	1131.22		0.530705	7.40529
543854801	1030.6	2386.43		0.615528	7.65027
543854802	1048.4	4078.46		0.648075	7.86657
543854803	1018.2	2181.81		0.606904	7.6935
543854804	1033.9	4447.32		0.642708	7.88744
543854811	1061.2	3020.63		0.639229	7.75799
543854812	1070.7	3101.79		0.63197	7.3613
543854813	1038.2	3210.15		0.622999	6.93664
543854814	1045.9	3347.11		0.633092	7.27066
543854821	1066.4	781.114		0.491213	7.06517
543854822	1073.9	2596.18		0.626463	7.71566
543854823	1053.7	3021.15		0.625715	7.18914
543854824	1057.2	2704.64		0.628128	7.65287
543854831	1064	3487.41		0.626505	6.90497
543854832	1054.6	5899.82		0.555708	6.87439
543854833	1039.3	3176.79		0.627349	7.14349
543854834	1028.5	5116.33		0.598759	6.91042
543854841	1036.9	5135.58		0.608402	7.33326
543854842	1031.4	4448.21		0.62518	7.14036
543854843	1016.8	4863.87		0.616893	7.28412
543854844	1015.4	2722.49		0.619771	7.32755
543854851	1028.2	2521.45		0.602191	6.87039
543854852	1025.9	3171.52		0.629501	7.25632
543854853	1015.4	500.744		0.458903	6.96385
543854854	1009.6	5486.56		0.582406	6.99123
543854901	1004.5	3178.56	1	0.645325	7.95923
543854902	1016.5	3609.58		0.644801	7.71659
543854903	981.6	2897.77		0.619173	7.13062
543854904	993.5	3947.83		0.634503	7.30739
543854911	1014	2956.05		0.61297	6.76694
543854912	1024	4063.53		0.63006	7.11536
543854913	991	2208.39		0.579794	6.55854
543854914	996	1388.41		0.53622	6.86023
543854921	1032.8	1427.14		0.544901	7.04435
543854922	1042.3	3393.1		0.638606	7.48882
543854923	1011.9	3145.23		0.619479	6.86984
543854924	1032.3	3944.75		0.630884	7.1034
543854931	1022.1	1267.83		0.534296	7.12648
543854932	1011	5284.84		0.600071	7.29612
543854933	999.9	745.985		0.473959	6.59789
543854934	1006.9	5151.72		0.61595	7.71562
543854941	995.2	4193.81		0.625779	7.02996
543854942	994.7	1984.67		0.590931	7.48659
543854943	978.6	2357.25		0.589019	6.6682
543854944	979.8	3408.74		0.634202	7.37097
543854951	993.7	271.457		0.429922	6.81691
543854952	997.8	4077.43	1	0.63729	7.46275
543854953	981.5	2714.4		0.617237	7.27362
543854954	985.4	2455.38		0.609257	7.32597
543863021	1433.8	2032.62		0.587462	6.68438
543863022	1480.8	0		0.404497	6.42766
543863023	1480.7	1545.7		0.546929	6.21743
543863024	1538.8	727.833		0.480536	6.25356
543863031	1468.3	2217.12		0.592307	6.45282
543863032	1473.1	139.666		0.408838	5.95606
543863033	1559.1	451.958		0.447079	6.0113
543863034	1532.4	895.749		0.487421	5.90046
543863041	1458	1367.01		0.528441	6.0355
543863042	1413	20.89		0.399425	6.20299
543863043	1543.2	1079.88		0.509679	6.11697
543863044	1485	1213.02		0.525622	6.37649
543863051	1355.3	938.924		0.501081	6.50822
543863052	1288.6	3242.04		0.61938	6.44698
543863053	1405.8	0		0.40623	6.59297
543863054	1327.9	1825.26		0.56533	6.40501
543863061	1220.2	3319.46		0.627525	6.82925
543863062	1213	3501.09		0.63157	6.92871
543863063	1261.7	1375.28		0.544449	6.89478
543863064	1243.5	1397.2		0.546312	6.92632
543863071	1177.9	2206.24	1	0.592577	6.84999
543863072	1172.2	3310.35		0.632324	7.10021
543863073	1194.7	3835.23		0.631345	6.90063
543863074	1150.7	1786.96		0.575342	7.12888
543863081	1131.4	2500.17		0.594756	6.46696
543863082	1166.1	2031.56	1	0.574167	6.48189
543863083	1154.3	1784.21	1	0.571619	6.98049
543863084	1171.7	4225.53	1	0.624365	6.76663
543863091	1133.8	1844.91	1	0.548101	5.90849
543863092	949.9	1801.08		0.551355	6.37669
543863093	1122.2	179.326		0.39978	5.83915
543863094	1003.2	1952.57		0.554786	6.08223
543863121	1614.3	987.122		0.490307	5.58437
543863122	1587.8	987.473		0.498222	5.92768
543863123	1707.7	1010.77		0.501216	5.81724
543863124	1625	1771.93		0.564587	6.13641
543863131	1675.1	0		0.395743	5.82213
543863132	1571.7	0		0.395573	5.94329
543863133	1670.4	645.349		0.468852	5.94857
543863134	1634.1	0		0.39956	6.03041
543863141	1634.9	0		0.401774	6.12253
543863142	1557.7	468.191		0.449902	6.06037
543863143	1652.1	0		0.393437	5.75551
543863144	1526.1	0		0.394172	5.94308
543863151	1441.9	2188.07		0.58428	6.21703
543863152	1348.2	2264.19		0.590445	6.43623
543863153	1409	1401.11		0.539148	6.42008
543863154	1349.2	2269.34		0.595696	6.63962
543863161	1284.7	0		0.409194	6.86738
543863162	1234.3	1064.8		0.521323	7.01868
543863163	1327.3	1140.76		0.510592	6.21718
543863164	1263.8	2854.88		0.610161	6.44612
543863171	1192.6	2368.36	1	0.613726	7.4029
543863172	1167.6	3418.02		0.643337	7.52354
543863173	1204.8	2097.12		0.59016	6.94253
543863174	1166.4	3301.07		0.633266	7.15251
543863181	1160.3	5355.56	1	0.615587	7.89644
543863182	1165.2	3298.42	1	0.642202	7.5405
543863183	1142.9	1883.02		0.582205	7.18093
543863184	1123.7	830.222	1	0.48373	6.51037
543863191	1141	2823.31	1	0.608299	6.56064
543863192	1030.4	3072.54	1	0.600394	6.11114
543863193	1101.4	702.2	1	0.459255	6.05483
543863194	1036.7	2657.61		0.599348	6.53743
543863221	1689.1	993.128		0.49832	5.78629
543863222	1680.1	1028.49		0.512181	6.22184
543863223	1714.1	1529.45		0.538603	5.63677
543863224	1795.3	1797.71		0.558646	5.61715
543863231	1735.9	1487.58		0.53957	5.76996
543863232	1777.8	0		0.388478	5.38879
543863233	1870.2	1923.01		0.566907	5.55335
543863234	1829	0		0.391359	5.44765
543863241	1633.6	0		0.392047	5.71942
543863242	1512.6	0		0.394107	5.95805
543863243	1645.3	0		0.395574	5.85214
543863244	1513.2	0		0.402722	6.31382
543863251	1416.8	0		0.406873	6.60565
543863252	1417	135.611		0.406421	5.94591
543863253	1488.3	0		0.392183	5.90698
543863254	1489	0		0.391638	5.88424
543863261	1355.8	0		0.391343	6.03899
543863262	1274.2	2266.05		0.595607	6.73684
543863263	1420.3	0		0.393567	6.05225
543863264	1310.5	0		0.397173	6.33918
543863271	1213.1	2505.73		0.60549	6.79967
543863272	1168.3	3766.45	1	0.637904	7.21141
543863273	1237.6	2489.9		0.60851	6.92035
543863274	1193.8	3770.18	1	0.637036	7.14239
543863281	1140.2	5398.61	1	0.597377	7.25245
543863282	1137.8	4865.43	1	0.611179	6.89536
543863283	1168.3	3948.38	1	0.62669	6.75492
543863284	1120.5	2317.27	1	0.585957	6.43807
543863291	1104.2	2441.29	1	0.592427	6.50373
543863292	1019.5	1918.08		0.559958	6.35047
543863293	1062	2910.75		0.604089	6.38455
543863294	1015.8	3774.33	1	0.632797	7.18444
543863322	1884	1186.84		0.511102	5.38433
543863331	1883.8	745.059		0.471967	5.41577
543863332	1723.4	0		0.393814	5.68012
543863333	1995.8	961.714		0.490796	5.21811
543863334	1775.8	0		0.387803	5.36397
543863341	1624.2	0		0.392096	5.73345
543863342	1572.6	0		0.393315	5.84729
543863343	1689.9	0		0.390632	5.58911
543863344	1664.5	0		0.395953	5.84266
543863351	1626.5	0		0.389576	5.6245
543863352	1561	0		0.394622	5.92026
543863353	1622.1	0		0.392191	5.74125
543863354	1497	0		0.39442	5.98938
543863361	1440.4	0		0.393242	6.01311
543863362	1331.2	0		0.394516	6.20232
543863363	1445.6	0		0.389759	5.85978
543863364	1382.1	0		0.386754	5.81458
543863371	1260.5	0		0.404215	6.6927
543863372	1203.5	3628.55	1	0.638996	7.22623
543863373	1275.4	0		0.402803	6.61602
543863374	1207.6	3341.48	1	0.633284	7.07827
543863381	1160.1	2083.58	1	0.575698	6.43758
543863382	1115.8	2777.03		0.597367	6.19541
543863383	1164.8	2235.96	1	0.584794	6.48882
543863384	1208.8	1111.21	1	0.502292	6.13576
543863391	1069.4	3812.02		0.628835	6.94845
543863392	1025	2565.37		0.611559	7.19509
543863393	1168.1	128.309		0.399142	5.98964
543863394	1075.8	4315.3		0.600065	5.92904
543863422	2067.1	208.657		0.419499	5.32573
543863424	2235.2	916.148		0.503384	5.5814
543863431	2011.1	814.333		0.478273	5.23876
543863432	1860.8	0		0.390274	5.35891
543863433	2122.1	151.373		0.411527	5.19002
543863434	2003	928.675		0.488869	5.24765
543863441	1790.7	0		0.391918	5.51612
543863442	1753.4	934.879		0.489475	5.56407
543863443	1866.1	1237.62		0.51526	5.41071
543863444	1755.2	208.664		0.414911	5.53465
543863451	1660	1187.81		0.509338	5.59464
543863452	1592.5	1270.95		0.516885	5.71009
543863453	1653.1	0		0.389318	5.58139
543863454	1539.3	0		0.389518	5.73427
543863461	1505	1012.06		0.492138	5.70672
543863462	1401.9	0		0.391886	6.00576
543863463	1423.9	1593.9		0.547509	6.17646
543863464	1349.7	678.947		0.471078	6.3052
543863471	1296.4	0		0.394037	6.22728
543863472	1216.1	2582.33	1	0.611992	6.94738
543863473	1283.1	277.488		0.439204	6.80163
543863474	1242.5	1377.39		0.542787	6.84638
543863481	1235.3	1786.88		0.555348	6.2165
543863482	1269.3	3077.12	1	0.629881	7.04375
543863483	1280.9	1687.42	1	0.577191	7.2995
543863484	1286.4	3407.33	1	0.662266	8.21106
543863491	1219.1	2450.79	1	0.595173	6.45643
543863492	1084.7	644.62	1	0.454482	6.11201
543863493	1250	2251.29	1	0.592284	6.65935
543863494	1094.7	348.454		0.420726	5.9748
543863531	2220.3	1414.54		0.539816	5.39299
543863532	2087.2	1009.67		0.498948	5.24848
543863534	2121.7	1229.6		0.52378	5.45413
543863541	1807.1	0		0.396975	5.70229
543863542	1680.9	0		0.398842	5.94027
543863543	1943.7	0		0.3915	5.30254
543863544	1842.5	0		0.393382	5.51191
543863551	1596	0		0.394568	5.87034
543863552	1529.1	0		0.393161	5.89501
543863553	1758.6	0		0.390964	5.51742
543863554	1670	0		0.394003	5.75616
543863561	1501.1	0		0.389981	5.79923
543863562	1393.9	496.196		0.450114	6.15578
543863563	1548.5	0		0.397064	6.03643
543863564	1420.9	0		0.397212	6.20252
543863571	1308.7	1698.96		0.561868	6.61237
543863572	1288.1	3694.12		0.632049	6.81285
543863573	1377.9	2690.46		0.615955	6.75407
543863574	1330.9	2833.82		0.613725	6.53543
543863581	1269.4	1679.1		0.591951	7.93938
543863582	1270.2	1900.45	1	0.576101	6.73094
543863583	1298.5	2485.62	1	0.613766	7.0703
543863584	1267.5	2074.59	1	0.580343	6.51171
543863591	1221	412.514		0.4375	6.2207
543863592	1098.5	594.029		0.446865	5.99417
543863593	1198.3	1849.58	1	0.566014	6.53612
543863594	1089	3548.78	1	0.611035	6.20256
543863632	2016.2	160.134		0.422956	5.75567
543863641	2049	971.384		0.500793	5.50985
543863642	1870.5	0		0.397772	5.65842
543863643	2042.3	1023.51		0.514738	5.88992
543863644	1961.9	0		0.40894	6.00198
543863651	1728.9	0		0.398631	5.87247
543863652	1627.2	0		0.402394	6.15615
543863653	1820.8	0		0.407246	6.11288
543863654	1716.4	0		0.405683	6.1811
543863661	1549.2	0		0.401179	6.20545
543863662	1473.4	0		0.402469	6.35317
543863663	1611.9	0		0.407923	6.40457
543863664	1527.1	154.026		0.428367	6.61901
543863671	1420.4	309.649		0.447537	6.82169
543863672	1381	3751.23		0.637872	6.94348
543863673	1455.6	2853.85		0.627996	6.95794
543863674	1397.3	2856.74		0.625176	6.90788
543863681	1312.1	4177.92	1	0.621602	6.44656
543863682	1245.4	1691.47	1	0.5634	6.77405
543863683	1328.7	3415.35	1	0.62948	6.72799
543863684	1272.7	3354.58	1	0.626848	6.71584
543863691	1187.3	2065.47		0.563582	5.95226
543863692	1098.2	2096.04	1	0.570799	6.28958
543863693	1198.6	1942.08	1	0.555023	5.87187
543863694	1133.5	3418.95		0.615319	6.37337
543863741	2058.4	1202.57		0.534491	6.04896
543863742	1962.2	0		0.416907	6.33047
543863743	2018.1	1414.13		0.539876	5.64955
543863744	1951.4	1178.75		0.533565	6.22072
543863751	1857.3	0		0.415411	6.40259
543863752	1754.2	0		0.412881	6.43002
543863753	1836.9	1184.51		0.533158	6.32939
543863754	1737.3	1098.75		0.533175	6.74327
543863761	1631.1	613.417		0.474954	6.36983
543863762	1534	1045.29		0.519765	6.64856
543863763	1661.9	1068.17		0.53019	6.82416
543863764	1586.5	0		0.411031	6.56353
543863771	1461.9	303.478		0.451405	6.95221
543863772	1404.7	2042.42		0.587029	6.68199
543863773	1510.6	0		0.408671	6.5621
543863774	1436.1	1740.12		0.570715	6.70288
543863781	1344.9	2974.57	1	0.623	6.75357
543863782	1297	2279.62		0.588865	6.40533
543863783	1366.8	2152.76		0.594721	6.80978
543863784	1322	1473.27		0.556089	6.99304
543863791	1232.7	5058.19		0.591068	6.23881
543863792	1132	3160.97		0.597882	5.80659
543863793	1254.1	2660.35		0.596837	6.15676
543863794	1116.2	2744.05		0.582076	5.61169
543863834	1932	0		0.405972	5.92303
543863841	1987.6	1078.85		0.518101	5.89977
543863842	1924.2	0		0.410449	6.11284
543863843	1937.1	982.024		0.518838	6.32956
543863844	1870.2	0		0.416799	6.44203
543863851	1797.7	0		0.411954	6.33333
543863852	1712.8	937.716		0.520819	6.84766
543863853	1792.4	0		0.420771	6.7024
543863854	1714	311.748		0.454956	6.74077
543863861	1659.4	1696.52		0.591373	7.38066
543863862	1614.1	0		0.423334	7.03153
543863863	1656	2108.6		0.616171	7.4317
543863864	1622.9	627.609		0.49179	6.992
543863871	1550.7	0		0.412336	6.66268
543863872	1472.1	573.943		0.475879	6.76544
543863873	1540.9	0		0.397772	6.07518
543863874	1435.2	0		0.3912	5.93299
543863881	1378	61.903		0.407655	6.39139
543863882	1304	1184.16		0.534312	7.04545
543863883	1395.7	0		0.397411	6.24278
543863884	1274.5	584.237		0.447267	5.83013
543863891	1182.9	2363.53		0.567589	5.53058
543863892	1085.2	492.067		0.424858	5.54042
543863893	1118.3	580.699		0.436181	5.59037
543863894	1172.2	0		0.376855	5.66189
543863932	1890.9	0		0.422375	6.64542
543863934	1800.7	418.285		0.452272	6.06164
543863941	1857.4	946.349		0.514466	6.38363
543863942	1818.4	0		0.414224	6.40369
543863943	1789.1	561.267		0.476713	6.45205
543863944	1712.3	0		0.396131	5.78966
543863951	1769.1	0		0.413359	6.43003
543863952	1694.8	0		0.404806	6.17225
543863953	1637.7	0		0.391164	5.67842
543863954	1550	0		0.38454	5.51068
543863961	1677.9	1044.77		0.533858	7.03193
543863962	1614.1	305.414		0.437965	6.21418
543863963	1569.1	0		0.380921	5.33862
543863964	1474.5	0		0.381431	5.47672
543863971	1522.1	0		0.397296	6.08011
543863972	1366.4	0		0.381621	5.61909
543863973	1410.4	0		0.386408	5.76664
543863974	1307.3	0		0.381931	5.70822
543863981	1334.2	0		0.386203	5.85363
543863982	1216	1426.33		0.510574	5.45063
543863983	1204.4	1724.52		0.545181	6.00803
543863984	1135.7	242.964		0.404514	5.72587
543863991	1169.8	0		0.377889	5.70848
543863992	1225.2	486.286		0.432525	5.70139
543863993	1217.1	0		0.376552	5.59226
543863994	1248.4	566.978		0.444253	5.80971
543864001	952.7	3659.78		0.621196	6.77906
543864002	958.9	1906.91		0.563903	6.61293
543864003	923.2	264.912		0.419529	6.51015
543864004	918.8	2432.85		0.608828	7.43017
543864011	960.3	1958.83		0.566964	6.61333
543864012	968.5	2710.81		0.604331	6.7562
543864013	935.2	2816.67	1	0.608611	6.84094
543864014	944.5	1406.93		0.539685	7.00744
543864021	967.2	920.187		0.485766	6.4551
543864022	1005.5	538.316		0.448913	6.42043
543864023	933.8	2161.91		0.582966	6.85299
543864024	969.4	0		0.380159	6.05628
543864031	984.6	1541.82		0.545442	6.79198
543864032	998.1	2572.13	1	0.621648	7.64352
543864033	955.8	1460.03		0.538972	6.80557
543864034	975.9	3274.65	1	0.630463	7.28873
543864041	962.9	3257.57		0.602627	6.14672
543864042	974.9	9284.51		0.201226	7.56044
543864043	949.4	3600.4		0.617387	6.63216
543864044	963	6919.73		0.483553	7.56581
543864051	971.6	2586.93		0.612047	7.25052
543864052	977.1	383.868		0.458894	7.50785
543864053	958.9	2945.66		0.615995	6.97352
543864101	987.2	1982.7		0.576869	6.92584
543864102	937.1	1197.97		0.491716	5.76683
543864103	972.9	3198.51		0.609425	6.45662
543864104	974.1	1360.46		0.509496	5.91169
543864111	897.5	2199.13		0.570601	6.32003
543864112	893.8	0		0.386052	6.39785
543864113	963.2	1433.02		0.513294	5.85408
543864114	897.2	2545.51		0.593177	6.62439
543864121	892.4	1583.76		0.525362	5.9889
543864122	911.2	3.429		0.371613	5.75008
543864123	850.4	4257.76		0.617358	6.89369
543864124	886.5	1490.67		0.532265	6.53697
543864131	941.1	1885.57		0.56705	6.81317
543864132	952.7	1619.51	1	0.554118	6.96275
543864133	913.9	513.65		0.439419	6.25613
543864134	925.7	3867.84	1	0.623032	6.88997
543864141	928.1	2326.12		0.584585	6.60695
543864142	950.3	7299.11		0.434589	7.24309
543864143	903.7	2766.19		0.611109	7.04651
543864144	935	2981.32		0.617828	7.0451
543864151	936.8	42.342		0.400171	6.72848
543864153	912.8	551.65		0.444621	6.30898
543864201	978.1	1709.72		0.567665	7.23423
543864202	1001	1090.49		0.491746	6.04832
543864203	990.4	3231.42	1	0.635933	7.53272
543864204	1029.2	2171.01		0.571264	6.23897
543864211	1008.8	1085.7		0.485836	5.8204
543864212	957.8	1875.06	1	0.557493	6.4317
543864213	1061.2	980.703		0.485092	6.09236
543864214	1001.2	1497.99		0.525791	6.11143
543864221	909.8	1821.75		0.542631	6.0277
543864222	835.4	1217.02		0.506938	6.43553
543864223	982.9	0		0.37725	5.91515
543864224	901	1528.3		0.523009	6.03987
543864231	845.3	619.252		0.450828	6.36765
543864232	903.2	2137.82	1	0.584105	6.98847
543864233	815	4157.06		0.612618	6.68154
543864234	875.3	1849.85		0.55448	6.47785
543864241	885.6	3471.17		0.629826	7.2762
543864242	909.7	2840.38		0.599586	6.47049
543864243	885	3146.56	1	0.63777	7.8076
543864244	873.1	2319.08	1	0.580169	6.50946
543864251	879.7	79.065		0.388983	6.16062
543864253	858.5	2305.56		0.574603	6.32558
543864264	927.5	0		0.413524	7.49183
543864273	929.2	230.742		0.43999	7.48658
543864301	987.2	2772.23	1	0.642195	8.25597
543864302	1027.1	1245.46	1	0.517342	6.51828
543864303	990	3365.23		0.661971	8.59191
543864304	1016.8	2900.85	1	0.615505	6.92823
543864311	1106.9	898.446	1	0.493281	6.65873
543864312	1029.7	2659.02		0.580702	5.77956
543864313	1102.4	1386.47	1	0.520334	6.10082
543864314	1037	1259.32		0.499387	5.74831
543864321	997.2	0		0.371516	5.65563
543864322	899.1	1109.22		0.475629	5.47187
543864323	895.9	2333.19		0.562139	5.72251
543864324	986.2	2972.72		0.581334	5.48163
543864331	830.3	2789.86		0.582975	5.94676
543864332	844.6	2692.18		0.58381	6.09434
543864333	929.2	2202.08		0.557085	5.72995
543864334	796.5	2395.36		0.585882	6.70035
543864341	872.1	1598.07		0.563949	7.51937
543864342	852.8	2932.65		0.602426	6.55534
543864343	837.3	2777.12	1	0.603816	6.8137
543864344	830.4	2470.91		0.584171	6.4599
543864351	840.3	724.78		0.45701	6.20379
543864353	818.9	431.553		0.423039	6.0559
543864361	903	253.243		0.426624	6.87822
543864362	909.1	932.787		0.490088	6.65371
543864363	889.4	1001.59		0.485126	6.23558
543864364	857.8	0		0.374778	5.96672
543864371	917.5	122.488		0.40415	6.53985
543864372	935.5	359.365		0.454259	7.48052
543864373	911.3	1378.76		0.53463	6.93302
543864374	932.1	17.814		0.395313	6.65088
543864401	1001.4	4631.36		0.636347	7.83634
543864402	1014.8	3196.49	1	0.638232	7.62539
543864403	1021.1	2409.61		0.599278	6.94437
543864404	1031.1	2803.05	1	0.632438	7.74161
543864411	1064.7	1768.89		0.556515	6.52334
543864412	997	0		0.366387	5.43342
543864413	1042.7	1676.74	1	0.563845	7.08669
543864414	936.2	1545.06		0.514356	5.60337
543864421	904.6	2032.29		0.55062	5.85922
543864422	1052.2	1423.96		0.520072	6.04124
543864423	974.4	2789.46		0.58396	5.80827
543864424	1043.4	1211.91		0.522101	6.79478
543864431	986.9	471.319		0.425424	5.77384
543864432	846.6	3180.7		0.594687	6.01766
543864433	1026.2	0		0.375543	5.78959
543864434	897.4	1882.93		0.540336	5.80111
543864441	777.6	3911.78		0.623394	7.09879
543864442	803.2	3271.38		0.605475	6.45797
543864443	795.4	3740.1		0.608262	6.42719
543864444	758.1	3221.65		0.622396	7.25542
543864451	807.9	2216.52		0.569776	6.36615
543864452	796.4	349.023	1	0.410913	5.94591
543864453	810.7	2591.64		0.598012	6.86398
543864454	789.3	717.446		0.445661	5.84149
543864461	842.2	1610.57		0.531566	6.22411
543864462	824.9	309.095		0.409873	6.04287
543864463	806.3	3040.34	1	0.603	6.53132
543864464	785	1843.2		0.545403	6.24271
543864471	858.3	920.949		0.470204	5.97007
543864472	908.9	0		0.385584	6.36015
543864473	798	0		0.373021	5.96688
543864501	1052.9	921.049		0.489991	6.5118
543864502	1049.1	1990.98	1	0.59414	7.53576
543864503	1084	216.593		0.414332	6.31691
543864504	1070.3	1371.08	1	0.547687	7.27805
543864511	1039.1	2228.81	1	0.600661	7.31448
543864512	955.9	1450.71		0.51892	6.03424
543864513	1014.5	1979.96	1	0.5713	6.6711
543864514	1005.5	1123.25	1	0.485091	5.66712
543864521	1039.1	2809.59	1	0.597865	6.2723
543864522	1054.7	754.243		0.474342	6.51174
543864523	1105.4	1860.85		0.547987	5.89992
543864524	1091.2	2522.19		0.5983	6.62927
543864531	1052.9	1699.39		0.534615	5.8411
543864532	947.5	4151.96		0.600815	6.02273
543864533	1087.5	1905.41		0.568092	6.62421
543864534	998.9	695.601		0.449348	5.81139
543864541	853.6	2303.74		0.574177	6.31833
543864542	787	2284.39		0.563235	5.99538
543864543	882.8	2672.26		0.582916	6.0348
543864544	866.2	975.994		0.474367	5.9273
543864551	766.7	2635.01		0.579821	6.10733
543864552	747.2	2163.43		0.566047	6.3986
543864553	847.1	1099.28		0.48897	6.10153
543864554	758.6	3166.26		0.594257	6.12191
543864561	735.2	2590.23		0.585663	6.45245
543864562	748.3	2964.92		0.598091	6.47381
543864563	745.1	2665.13	1	0.588616	6.45221
543864564	725	4270.76		0.599524	6.31758
543864571	745.7	431.199		0.424244	6.19898
543864573	722.1	2601.68		0.575036	6.0193
543864574	696.7	1158.78		0.494949	6.32657
543864601	1099.5	2884.88		0.610519	6.6338
543864602	1047.7	1511.97	1	0.54177	6.65157
543864603	1072.2	946.218		0.476737	5.87075
543864604	1014	890.771		0.462689	5.58328
543864611	984.8	1844.19		0.536085	5.61642
543864612	1047.9	971.879		0.470737	5.56869
543864613	1052.9	1213.16		0.490142	5.51111
543864614	1078.6	994.201		0.472988	5.54161
543864621	1138.1	1969.89		0.558307	6.01475
543864622	1126.7	1006.4		0.501824	6.58344
543864623	1182.5	1064.37	1	0.489447	5.82004
543864624	1161.8	309.312		0.419344	6.00885
543864631	1094.6	384.689		0.466043	7.64217
543864632	1046.3	1422.39		0.515911	5.88618
543864633	1110.7	1502.12		0.551899	7.00582
543864634	1098.1	3130.79		0.617028	6.66977
543864641	932.9	1104.86		0.486659	5.88236
543864642	925.3	1897.95		0.548482	6.05707
543864643	982.3	1481.05		0.521578	6.01761
543864644	934.8	2412.63		0.58	6.25669
543864651	881.5	1049.05		0.486285	6.12511
543864652	835.4	1465.79		0.519716	6.17284
543864653	914.7	1055.45		0.482238	5.89966
543864654	887	0		0.377226	6.03327
543864661	777.4	1986.35	1	0.55592	6.33361
543864662	746.4	2244.74		0.56204	6.07416
543864663	828	1137.04	1	0.487867	5.95419
543864664	822.1	1203.54		0.496496	6.08208
543864671	757.1	2885.07		0.595253	6.43202
543864672	747.8	530.057		0.43295	6.13361
543864673	797.2	1311.66		0.503181	6.03237
543864701	1047.9	0		0.370972	5.56607
543864702	1087.4	0		0.376535	5.7539
543864703	1106.2	1041.89		0.479063	5.58204
543864704	1117.4	0		0.377292	5.74733
543864711	1080.4	1038.45		0.478779	5.61371
543864712	1084.5	1086.4		0.484607	5.67461
543864713	1118.9	1067.25		0.482684	5.62121
543864714	1128.4	2086.2		0.557811	5.74883
543864721	1164.5	1279.79		0.513066	6.06631
543864722	1153.7	1096.11		0.501327	6.21764
543864723	1205.9	3363.09		0.616336	6.35234
543864724	1159.6	3259		0.608672	6.14905
543864731	1139.3	1137.22		0.516311	6.69224
543864732	1078.9	1432.35		0.53274	6.48477
543864733	1147.1	2325.94		0.597925	6.87964
543864734	1087.9	2831.58		0.609876	6.68295
543864741	987.3	1348.04		0.531891	6.82189
543864742	948.2	3659.69		0.613914	6.47741
543864743	1010.5	3904.93		0.614929	6.44755
543864744	983.1	3002.38	1	0.610037	6.63671
543864751	978.3	1020.01		0.493024	6.37236
543864752	930.5	0		0.369918	5.66994
543864753	986.9	2532.68	1	0.597628	6.71547
543864754	938.3	0		0.368164	5.58363
543864761	877.4	0		0.371045	5.78222
543864762	909.4	2695.07		0.579703	5.84084
543864763	932.9	220.393		0.393388	5.62229
543864764	938.5	1299.3		0.498994	5.72734
543864771	831.1	411.026		0.423153	6.13369
543864773	878.2	0		0.372146	5.82904
543864801	1160.4	1011.13		0.47906	5.62084
543864802	1160.2	0		0.378753	5.75588
543864803	1225.3	1656.38		0.537625	5.86119
543864804	1199.9	0		0.383989	5.92726
543864811	1168.1	0		0.377036	5.67391
543864812	1151.1	2897.93		0.599005	6.07541
543864813	1204.3	820.105		0.470424	5.91895
543864814	1202.1	1146.2		0.50136	5.98926
543864821	1242.3	2293.14		0.584205	6.25867
543864822	1242.8	1711.66		0.546403	6.04143
543864823	1308.7	1058.93		0.499777	6.09134
543864824	1310.8	0		0.403378	6.59553
543864831	1174.9	2386.67		0.594209	6.58156
543864832	1117.8	463.147		0.457634	6.94201
543864833	1203.2	1283.16		0.525053	6.48263
543864834	1151.2	499.004		0.464794	7.03609
543864841	1062.4	1663.62		0.54775	6.44855
543864842	1017.3	2366.73	1	0.601171	7.10332
543864843	1068.9	1050.21		0.500341	6.44341
543864844	1049.2	4332.07	1	0.627557	7.12567
543864851	1013.6	2651.14	1	0.609501	6.99706
543864852	1014.9	2069.28		0.575092	6.62601
543864853	1043.3	1811.1		0.566939	6.86268
543864854	1029.8	1821.29		0.569164	6.94465
543864861	980.2	1806.42		0.546141	6.11762
543864862	949.9	0		0.372818	5.76839
543864863	983.2	8.587		0.385267	6.21074
543864901	1246.1	1537.55		0.536722	6.12653
543864902	1236.6	0		0.381754	5.78719
543864903	1292.4	3156.31		0.619632	6.51487
543864904	1282.4	0		0.390217	6.08408
543864911	1219.6	987.641		0.49075	6.09374
543864912	1251.9	277.111		0.420161	6.07079
543864913	1260.5	56.869		0.399974	6.24587
543864914	1306.7	1994.35		0.566978	6.0979
543864921	1352.8	1739.9		0.561541	6.43703
543864922	1343.3	0		0.408908	6.78219
543864923	1419.8	88.958		0.408801	6.25928
543864924	1366.3	0		0.405009	6.59232
543864931	1229.7	0		0.393442	6.28435
543864932	1163	2768.32		0.607796	6.57935
543864933	1249.4	0		0.393905	6.27815
543864934	1198.8	2453.72		0.588493	6.20171
543864941	1085.1	936.7	1	0.490857	6.44852
543864942	1080.2	4736.66	1	0.62269	7.27951
543864943	1147	3709.63		0.621188	6.5279
543864944	1124.4	3479.31	1	0.621306	6.61172
543864951	1063.1	3678.36		0.630625	7.03654
543864952	1027.2	17.735		0.399357	6.69888
543864953	1086.8	867.966		0.492226	6.75252
543873041	1782.3	988.314		0.534281	7.11612
543873042	1742.4	0		0.41596	6.56978
543873043	1778.4	934.355		0.508648	6.29513
543873044	1717.7	0		0.402671	6.05354
543873051	1634.7	0		0.385834	5.45544
543873052	1538.1	0		0.385324	5.55771
543873053	1642	0		0.393848	5.78132
543873054	1675.2	0		0.385693	5.40137
543873061	1446.8	0		0.385556	5.68098
543873062	1362.5	0		0.383134	5.6868
543873063	1550.3	0		0.383898	5.48227
543873064	1446.4	0		0.390145	5.87573
543873071	1313.3	0		0.382583	5.72729
543873072	1239.1	1054.63		0.481492	5.46642
543873073	1340.5	0		0.384494	5.77223
543873074	1331.1	1146.8		0.497022	5.65583
543873081	1179	954.38		0.474107	5.60165
543873082	1284.8	0		0.376875	5.52126
543873083	1213.4	0		0.38511	5.95675
543873084	1348.5	619.344		0.457117	5.98914
543873091	1277.8	0		0.382731	5.77653
543873092	1281.6	0		0.387914	5.98988
543873093	1338.2	244.597		0.410136	5.69799
543873094	1325.1	0		0.384107	5.77584
543873141	1861.1	1157.85		0.529417	6.23988
543873142	1795.7	0		0.402654	5.95382
543873143	1889.8	322.835		0.434365	5.6474
543873144	1894.4	1331.72		0.540484	6.0788
543873151	1787.6	0		0.395323	5.6609
543873152	1806.5	0		0.398051	5.75145
543873153	1934.7	800.596		0.496484	6.11138
543873154	1868.1	0		0.400233	5.76454
543873161	1649.7	0		0.396225	5.87067
543873162	1504.5	467.98		0.444312	5.90171
543873163	1684.4	104.7		0.410597	5.92442
543873164	1537.1	2177.86		0.582839	6.05721
543873171	1395.3	1485.14		0.531244	5.87185
543873172	1386	74.72		0.389311	5.56141
543873173	1512.4	1463.19		0.537991	6.05908
543873174	1432.9	0		0.386505	5.74166
543873181	1240.5	0		0.382918	5.83016
543873182	1390.2	0		0.389182	5.90688
543873183	1274.3	0		0.382438	5.76774
543873184	1332.1	0		0.384727	5.7935
543873191	1415.2	1577.28		0.539816	5.92647
543873192	1386.1	0		0.385484	5.75602
543873193	1437	1374.83		0.523907	5.85802
543873194	1463.6	347.686		0.430075	5.89628
543873242	1801.3	0		0.390953	5.46428
543873251	1910.9	988.22		0.499908	5.59028
543873252	1790.2	0		0.394699	5.6311
543873253	1913	1083.15		0.514153	5.82091
543873254	1767.2	1855.4		0.566083	5.8093
543873261	1632.2	890.27		0.498518	6.23442
543873262	1593	2614.21		0.608622	6.28734
543873263	1672.5	2547.2		0.601402	5.98845
543873264	1692.1	520.501		0.457865	5.99233
543873271	1605.2	0		0.394974	5.87599
543873272	1506.2	0		0.38609	5.63052
543873273	1671	0		0.396794	5.87012
543873274	1528.9	0		0.384578	5.5398
543873281	1358.3	0		0.379407	5.53387
543873282	1313.6	0		0.379409	5.5889
543873283	1435.8	0		0.382924	5.58561
543873284	1367.8	0		0.382337	5.64649
543873291	1506.1	1353.03		0.516825	5.55707
543873292	1510.2	414.839		0.437704	5.85452
543873293	1556.7	1505.02		0.533381	5.69742
543873294	1583.1	0		0.393416	5.83893
543873351	1933.7	978.385		0.505532	5.81919
543873352	1797.7	2109.89		0.583229	5.88903
543873361	1807.3	635.117		0.465944	5.70157
543873362	1778.9	0		0.394946	5.65685
543873363	1864.7	0		0.400053	5.76392
543873364	1808.3	0		0.401888	5.90465
543873371	1678.3	0		0.393281	5.71498
543873372	1614.6	0		0.388304	5.58618
543873373	1767.1	0		0.39125	5.51633
543873374	1765.7	0		0.390592	5.49342
543873381	1509	0		0.381365	5.43024
543873382	1398.1	0		0.38842	5.86339
543873383	1550.2	0		0.384586	5.51196
543873384	1420.8	0		0.388563	5.84075
543873391	1607.7	233.518		0.419287	5.78699
543873392	1656.4	902.769		0.500197	6.22728
543873393	1587.3	0		0.388585	5.63386
543873394	1677.7	1722.34		0.567258	6.30748
543873461	1835.3	0		0.396315	5.64639
543873462	1925.8	0		0.402158	5.76934
543873464	2042	0		0.409461	5.92645
543873471	1945.1	0		0.413419	6.20892
543873472	1842.5	0		0.394146	5.54481
543873473	2019	0		0.419275	6.35669
543873474	1842.3	0		0.391238	5.42358
543873481	1638.1	0		0.38283	5.32893
543873482	1446.4	389.76		0.437856	6.04946
543873483	1619.2	354.197		0.426861	5.54331
543873484	1469.1	1825.96		0.557315	5.90229
543873491	1518.9	107.385		0.410799	6.12969
543873492	1660.3	763.635		0.474614	5.72988
543873493	1512	2501.29		0.61601	6.8718
543873494	1580.2	877.579		0.500623	6.43264
543873562	2081.9	0		0.404089	5.65702
543873564	2008.9	0		0.4007	5.60654
543873571	1944.3	0		0.39467	5.43171
543873572	1725.2	0		0.397743	5.839
543873573	1848.9	0		0.401048	5.82045
543873574	1737	0		0.402133	6.00701
543873581	1601	0		0.390612	5.70061
543873582	1561.4	0		0.388858	5.67792
543873583	1694	0		0.405307	6.19304
543873584	1671.6	0		0.403538	6.14872
543873591	1513.1	540.536		0.456755	6.08781
543873592	1563.3	1636.84		0.555293	6.19542
543873593	1624.3	0		0.394073	5.81577
543873594	1635.7	0		0.394361	5.81345
543873662	1905.8	220.444		0.429325	5.8788
543873671	1858.8	1170.24		0.528858	6.17758
543873672	1816.3	217.058		0.436091	6.27859
543873673	1826.8	0		0.391804	5.46788
543873674	1888.2	1333.58		0.539471	6.04011
543873681	1758.9	0		0.416569	6.57279
543873682	1722	0		0.412604	6.45717
543873683	1840.9	1429.21		0.546142	6.07455
543873684	1787.5	384.822		0.45485	6.32505
543873691	1703	0		0.404287	6.13874
543873692	1705.8	288.637		0.430233	5.85803
543873693	1821.4	1442.92		0.539948	5.81093
543873694	1814.6	1300.79		0.533497	5.99569
543873772	1888.9	0		0.398465	5.66659
543873781	1928.8	135.374		0.415931	5.69513
543873782	1837.9	1279.4		0.522443	5.5971
543873791	1744	225.629		0.414572	5.45386
543873792	1872.8	365.543		0.432508	5.40475
543874001	1327.4	1693.87		0.553318	6.26074
543874002	1340.5	1003.66		0.500848	6.28681
543874003	1365.1	475.307		0.451218	6.32455
543874004	1415.7	2420.22		0.595168	6.26219
543874011	1315.2	1336.05		0.526248	6.22404
543874012	1340.4	2716.23		0.604824	6.30195
543874013	1398.6	1738.43		0.552295	6.01217
543874014	1484.4	0		0.390001	5.82365
543874021	1439.5	0		0.405299	6.51439
543874022	1413.1	0		0.404585	6.51674
543874023	1464.8	0		0.399077	6.22478
543874024	1455.9	0		0.39637	6.12149
543874031	1318.8	755.187		0.470026	6.00614
543874032	1284.5	2493.74		0.589627	6.07646
543874033	1372.3	970.685		0.497988	6.24955
543874034	1372.2	0		0.404362	6.55933
543874041	1237.9	694.808		0.471784	6.41337
543874042	1182.1	0		0.385682	6.02084
543874043	1327	1263.95		0.519567	6.1708
543874044	1229.1	0		0.393587	6.29196
543874101	1418.8	2175.14		0.583058	6.22203
543874102	1497.8	3054.51		0.618921	6.3148
543874103	1437.5	830.926		0.483045	6.0858
543874104	1492.1	2526.03		0.597214	6.07507
543874111	1500.7	0		0.394124	5.97359
543874112	1589.7	0		0.407632	6.42147
543874113	1570.5	416.673		0.456598	6.53145
543874114	1644.1	0		0.414291	6.62468
543874121	1552.7	0		0.394942	5.94117
543874122	1505.7	193.695		0.413275	5.84643
543874123	1675	0		0.403321	6.13483
543874124	1530.3	0		0.393671	5.91491
543874131	1432.3	1284.11		0.531732	6.45797
543874132	1431.6	223.831		0.441426	6.94673
543874133	1488.1	3000.28		0.623843	6.58375
543874134	1447.5	995.505		0.51555	6.76345
543874141	1365.8	1269.42		0.516269	5.97405
543874142	1268.6	0		0.386264	5.93513
543874143	1410.6	0		0.396304	6.17609
543874201	1507.1	175.478		0.41665	6.06709
543874202	1565.8	2135.11		0.571402	5.64458
543874203	1596.3	1589.52		0.539387	5.649
543874204	1658	0		0.386416	5.45237
543874211	1671.9	0		0.388128	5.50545
543874212	1725.5	0		0.406298	6.19315
543874213	1755.2	0		0.394756	5.68108
543874214	1820.1	0		0.408716	6.17513
543874221	1762.9	0		0.390795	5.50276
543874222	1581.5	755.456		0.47941	6.04608
543874223	1800.3	0		0.404903	6.0405
543874224	1672.5	957.545		0.497342	5.89416
543874231	1556	620.295		0.465905	6.0749
543874233	1660.1	0		0.395474	5.82984
543874301	1668.1	1848.8		0.56072	5.73492
543874302	1772.1	0		0.389787	5.45052
543874303	1758.6	573.074		0.461668	5.84218
543874304	1873.1	0		0.398207	5.67417
543874311	1791.1	0		0.391096	5.48155
543874312	1913.7	0		0.413718	6.26299
543874313	1974.4	0		0.405035	5.83119
543874314	1988.6	0		0.413531	6.15916
543874321	1886.2	0		0.406908	6.0165
543874322	1804.6	930.764		0.490312	5.54608
543874323	2033.9	0		0.403053	5.67094
543874324	1947.7	405.109		0.44507	5.64264
543874331	1763.5	0		0.401065	5.93106
543874401	1765.9	1142.04		0.513715	5.78942
543874402	1871.2	446.312		0.445561	5.5882
543874403	1698.5	0		0.402697	6.08127
543874404	1786.1	1499.26		0.563317	6.62706
543874411	1974.9	0		0.398511	5.56093
543874412	2024.8	0		0.408006	5.89015
543874413	1848.3	0		0.414046	6.35788
543874414	1971	966.061		0.506594	5.85831
543874421	2111.3	82.771		0.419909	5.87377
543874422	2069.4	0		0.412389	6.01075
543874423	2067.4	67.136		0.416753	5.87395
543874501	1676.4	1819.45		0.571873	6.24837
543874502	1796.7	1398.77		0.548676	6.32369
543874503	1643.7	0		0.402071	6.12331
543874504	1756.3	2388.22		0.593987	5.8445
543874511	1877.2	910.48		0.507117	6.19865
543874512	1932.8	829.955		0.498707	6.0917
543874513	1804.9	267.677		0.4315	5.8802
543874514	1853.2	0		0.403314	5.91199
543874601	1701.7	495.912		0.456313	6.01805
543874602	1702.8	2263.36		0.591531	6.03719
543874603	1807.1	2369.36		0.60583	6.3014
543874604	1758.1	4478.76		0.628372	6.39345
543874611	1778.2	2711.99		0.607235	5.86006
543874612	1852.6	0		0.406721	6.05154
543874613	1838.9	427.069		0.449046	5.84749
543874701	1902.3	0		0.404797	5.91038
543874702	1839.2	1799.67		0.566068	5.85869
543874703	1905.3	0		0.396637	5.56966
543874704	1886.7	7.413		0.402246	5.78895
543874711	1873.8	630.526		0.467365	5.69317
	2479.1

## Sheet: Accuracy test
> #####定性検査の診断への正確度の評価#####
> .Table <- matrix(c(170, 386, 24, 812), 2, 2, byrow=TRUE)
> epi.tests(.Table, conf.level = 0.95)
Disease positive Disease negative Total
Test positive 170 386 556
Test negative 24 812 836
Total 194 1198 1392
Point estimates and 95 % CIs:
---------------------------------------------------------
Apparent prevalence 0.399 (0.374, 0.426)
True prevalence 0.139 (0.122, 0.159)
Sensitivity 0.876 (0.822, 0.919)
Specificity 0.678 (0.651, 0.704)
Positive predictive value 0.306 (0.268, 0.346)
Negative predictive value 0.971 (0.958, 0.982)
Diagnstic accuracy 0.705 (0.681, 0.729)
Likelihood ratio of a positive test 2.72 (2.467, 2.999)
Likelihood ratio of a negative test 0.183 (0.125, 0.266)
---------------------------------------------------------

## Sheet: Over Threshold
FID	mesh_code	elevation	Road	Disease_Potential	TWI	Disease_occurrence
1253	543864504	1070.3	1371.08	0.547687	7.27805	Y
635	543863091	1133.8	1844.91	0.548101	5.90849	Y
401	543853674	1146.8	1590.47	0.548757	6.58414	Y
283	543853471	1325.4	1380.58	0.551072	7.06563	Y
354	543854502	1188.1	1458.86	0.551729	7.02803	Y
452	543853762	1227	1800.64	0.553901	6.1335	Y
1156	543864132	952.7	1619.51	0.554118	6.96275	Y
812	543863693	1198.6	1942.08	0.555023	5.87187	Y
1305	543864661	777.4	1986.35	0.55592	6.33361	Y
1170	543864212	957.8	1875.06	0.557493	6.4317	Y
171	543853283	1403.3	1606.24	0.557857	6.5866	Y
288	543853482	1279.5	5959.31	0.558266	6.86376	Y
237	543854303	1312.6	6061.13	0.55951	7.16157	Y
807	543863682	1245.4	1691.47	0.5634	6.77405	Y
1225	543864413	1042.7	1676.74	0.563845	7.08669	Y
787	543863593	1198.3	1849.58	0.566014	6.53612	Y
284	543853472	1295.9	1523.37	0.566977	7.32218	Y
811	543863692	1098.2	2096.04	0.570799	6.28958	Y
1256	543864513	1014.5	1979.96	0.5713	6.6711	Y
633	543863083	1154.3	1784.21	0.571619	6.98049	Y
632	543863082	1166.1	2031.56	0.574167	6.48189	Y
724	543863381	1160.1	2083.58	0.575698	6.43758	Y
782	543863582	1270.2	1900.45	0.576101	6.73094	Y
756	543863483	1280.9	1687.42	0.577191	7.2995	Y
1184	543864244	873.1	2319.08	0.580169	6.50946	Y
784	543863584	1267.5	2074.59	0.580343	6.51171	Y
1178	543864232	903.2	2137.82	0.584105	6.98847	Y
726	543863383	1164.8	2235.96	0.584794	6.48882	Y
698	543863284	1120.5	2317.27	0.585957	6.43807	Y
573	543853973	1144.7	2083.48	0.586099	6.88063	Y
233	543853393	1336.8	1945.85	0.587185	6.99275	Y
441	543853733	1324.7	2158.62	0.588285	6.58568	Y
1276	543864563	745.1	2665.13	0.588616	6.45221	Y
503	543853843	1274.9	2200.91	0.589651	6.6184	Y
456	543853772	1154.2	2425.41	0.590607	6.3927	Y
453	543853763	1170.8	2033.96	0.591274	7.16833	Y
234	543853394	1332.6	1966.59	0.591312	7.11943	Y
760	543863493	1250	2251.29	0.592284	6.65935	Y
699	543863291	1104.2	2441.29	0.592427	6.50373	Y
627	543863071	1177.9	2206.24	0.592577	6.84999	Y
389	543853644	1303.8	2262.67	0.592785	6.59113	Y
1251	543864502	1049.1	1990.98	0.59414	7.53576	Y
758	543863491	1219.1	2450.79	0.595173	6.45643	Y
492	543853814	1355	2310.32	0.597171	6.61733	Y
695	543863281	1140.2	5398.61	0.597377	7.25245	Y
1334	543864753	986.9	2532.68	0.597628	6.71547	Y
1258	543864521	1039.1	2809.59	0.597865	6.2723	Y
565	543853953	1296.4	2319.77	0.598994	6.7481	Y
668	543863192	1030.4	3072.54	0.600394	6.11114	Y
1254	543864511	1039.1	2228.81	0.600661	7.31448	Y
1359	543864842	1017.3	2366.73	0.601171	7.10332	Y
286	543853474	1264.5	2405.41	0.602455	6.78084	Y
1245	543864463	806.3	3040.34	0.603	6.53132	Y
400	543853673	1202.2	2513.63	0.603736	6.72869	Y
1207	543864343	837.3	2777.12	0.603816	6.8137	Y
352	543853594	1205.8	5412.44	0.605195	7.52274	Y
571	543853971	1135.2	2155.12	0.605228	7.53096	Y
350	543853592	1231.1	5435.01	0.607671	7.6435	Y
667	543863191	1141	2823.31	0.608299	6.56064	Y
1126	543864013	935.2	2816.67	0.608611	6.84094	Y
1362	543864851	1013.6	2651.14	0.609501	6.99706	Y
521	543853891	1046	2679.15	0.60962	6.92189	Y
1331	543864744	983.1	3002.38	0.610037	6.63671	Y
788	543863594	1089	3548.78	0.611035	6.20256	Y
439	543853731	1360.7	4945.79	0.611151	6.73149	Y
696	543863282	1137.8	4865.43	0.611179	6.89536	Y
751	543863472	1216.1	2582.33	0.611992	6.94738	Y
445	543853743	1264.3	2445.11	0.612502	7.12794	Y
659	543863171	1192.6	2368.36	0.613726	7.4029	Y
783	543863583	1298.5	2485.62	0.613766	7.0703	Y
295	543854401	1275.5	2486.41	0.614485	7.12928	Y
1192	543864304	1016.8	2900.85	0.615505	6.92823	Y
663	543863181	1160.3	5355.56	0.615587	7.89644	Y
280	543853462	1354.7	2606.25	0.616727	6.93602	Y
231	543853391	1380.3	2556.15	0.617636	7.01909	Y
438	543853724	1382.9	2878.58	0.618944	6.6374	Y
464	543853792	1087.4	2611.96	0.619413	7.37642	Y
344	543853574	1198.9	2808.87	0.619483	6.97414	Y
409	543853694	1114.4	2526.49	0.620734	7.52857	Y
1388	543864944	1124.4	3479.31	0.621306	6.61172	Y
806	543863681	1312.1	4177.92	0.621602	6.44656	Y
1133	543864032	998.1	2572.13	0.621648	7.64352	Y
498	543853832	1267.5	3048.13	0.621993	6.73729	Y
560	543853942	1292.7	3092.14	0.622297	6.67907	Y
390	543853651	1277.6	3137.55	0.622413	6.66538	Y
412	543854603	1103.9	2728.49	0.622465	7.32172	Y
388	543853643	1329.7	4579.62	0.622528	6.78085	Y
1386	543864942	1080.2	4736.66	0.62269	7.27951	Y
413	543854604	1103.4	2748.91	0.622704	7.30495	Y
830	543863781	1344.9	2974.57	0.623	6.75357	Y
575	543853981	1146.1	2973.51	0.623005	7.00515	Y
1158	543864134	925.7	3867.84	0.623032	6.88997	Y
342	543853572	1232.2	2921.53	0.623837	6.98787	Y
454	543853764	1169.3	3094.72	0.624033	6.90549	Y
634	543863084	1171.7	4225.53	0.624365	6.76663	Y
501	543853841	1236.2	3399.41	0.62479	6.65176	Y
467	543854701	1076.7	4828	0.624971	7.50002	Y
519	543853883	1146.3	3341.45	0.625496	6.82418	Y
460	543853782	1103.1	2927.55	0.625702	7.221	Y
458	543853774	1154.3	3133.5	0.625741	6.96541	Y
457	543853773	1150.8	2969.06	0.625756	7.11971	Y
451	543853761	1218.9	3006.84	0.626388	7.02371	Y
497	543853831	1317.8	4229.09	0.626491	6.67639	Y
443	543853741	1276.2	4511.72	0.626588	6.95133	Y
697	543863283	1168.3	3948.38	0.62669	6.75492	Y
402	543853681	1167.8	2844.85	0.626724	7.27646	Y
809	543863684	1272.7	3354.58	0.626848	6.71584	Y
385	543853634	1368.8	4215.92	0.627519	6.64747	Y
1361	543864844	1049.2	4332.07	0.627557	7.12567	Y
289	543853483	1249.3	3362.68	0.628048	6.79505	Y
494	543853822	1357.5	3826.08	0.62811	6.55869	Y
229	543853383	1323	4715.93	0.628836	7.21473	Y
343	543853573	1218.4	2982.09	0.629148	7.16593	Y
808	543863683	1328.7	3415.35	0.62948	6.72799	Y
502	543853842	1202.7	3271	0.629631	6.96964	Y
755	543863482	1269.3	3077.12	0.629881	7.04375	Y
410	543854601	1136.2	3175.68	0.63038	7.15201	Y
1135	543864034	975.9	3274.65	0.630463	7.28873	Y
465	543853793	1074.2	3339.95	0.63122	7.15921	Y
355	543854503	1168.3	3416.39	0.631811	7.0264	Y
1222	543864404	1031.1	2803.05	0.632438	7.74161	Y
440	543853732	1317.8	4152.81	0.632455	6.88681	Y
444	543853742	1249.1	3760.33	0.632466	6.87759	Y
356	543854504	1158.8	3431.94	0.632643	7.06832	Y
222	543853364	1398.4	3163.93	0.632792	6.93423	Y
702	543863294	1015.8	3774.33	0.632797	7.18444	Y
569	543853963	1184.4	3952.61	0.63322	7.01312	Y
723	543863374	1207.6	3341.48	0.633284	7.07827	Y
563	543853951	1243.5	3748.7	0.633293	6.91919	Y
495	543853823	1363.7	3975.95	0.633406	6.80255	Y
230	543853384	1316.5	4248.34	0.633473	6.98656	Y
493	543853821	1397.4	4491.95	0.633535	7.07713	Y
509	543853861	1138.8	3080.52	0.634035	7.38222	Y
568	543853962	1138.2	4110.28	0.634238	7.16862	Y
411	543854602	1131.2	3184.85	0.634552	7.33072	Y
448	543853752	1205.6	3015.5	0.634646	7.38402	Y
351	543853593	1189.4	3230.63	0.635576	7.26551	Y
287	543853481	1288.9	2958.97	0.635735	7.38672	Y
1167	543864203	990.4	3231.42	0.635933	7.53272	Y
442	543853734	1301.8	3310.82	0.636041	7.09543	Y
353	543854501	1202.6	3572.3	0.636857	7.14644	Y
694	543863274	1193.8	3770.18	0.637036	7.14239	Y
604	543854952	997.8	4077.43	0.63729	7.46275	Y
349	543853591	1217.7	3646.02	0.637459	7.13966	Y
1183	543864243	885	3146.56	0.63777	7.8076	Y
692	543863272	1168.3	3766.45	0.637904	7.21141	Y
455	543853771	1183.7	3843.92	0.638012	7.20115	Y
1220	543864402	1014.8	3196.49	0.638232	7.62539	Y
524	543853894	1015.5	3743.55	0.638409	7.42607	Y
227	543853381	1358.2	4262.35	0.638435	7.15925	Y
228	543853382	1350.5	3508.84	0.638587	7.0546	Y
398	543853671	1192.7	3545	0.638826	7.25105	Y
408	543853693	1124.4	3298.46	0.638874	7.44658	Y
447	543853751	1220.1	3844.72	0.638894	7.19351	Y
721	543863372	1203.5	3628.55	0.638996	7.22623	Y
348	543853584	1178.3	3558.54	0.639338	7.28847	Y
290	543853484	1239.7	4040.43	0.639771	7.25369	Y
346	543853582	1206.9	3737.86	0.639961	7.25429	Y
505	543853851	1172.5	3107.95	0.640544	7.59593	Y
449	543853753	1191.2	4113.62	0.6412	7.40289	Y
446	543853744	1220.2	3429.27	0.641436	7.37011	Y
347	543853583	1184.7	3346.18	0.64178	7.4715	Y
293	543853493	1247.7	3485.03	0.642167	7.34726	Y
1189	543864301	987.2	2772.23	0.642195	8.25597	Y
664	543863182	1165.2	3298.42	0.642202	7.5405	Y
416	543854613	1124.6	4573.72	0.642584	7.88954	Y
574	543853974	1129.9	3282.59	0.642657	7.61315	Y
583	543854901	1004.5	3178.56	0.645325	7.95923	Y
506	543853852	1154.6	3626.26	0.64575	7.58042	Y
757	543863484	1286.4	3407.33	0.662266	8.21106	Y
625	543863063	1261.7	1375.28	0.544449	6.89478	N
578	543853984	1112.1	1912.7	0.54463	5.63239	N
591	543854921	1032.8	1427.14	0.544901	7.04435	N
504	543853844	1233.6	1535.23	0.545002	6.47965	N
883	543863983	1204.4	1724.52	0.545181	6.00803	N
1246	543864464	785	1843.2	0.545403	6.24271	N
1132	543864031	984.6	1541.82	0.545442	6.79198	N
523	543853893	1003.5	1576.35	0.545881	6.68823	N
1366	543864861	980.2	1806.42	0.546141	6.11762	N
1097	543873683	1840.9	1429.21	0.546142	6.07455	N
626	543863064	1243.5	1397.2	0.546312	6.92632	N
1351	543864822	1242.8	1711.66	0.546403	6.04143	N
14	543844823	2374.1	1325.25	0.546589	5.74994	N
609	543863023	1480.7	1545.7	0.546929	6.21743	N
429	543854644	1087.5	6381.77	0.547355	7.96099	N
748	543863463	1423.9	1593.9	0.547509	6.17646	N
1358	543864841	1062.4	1663.62	0.54775	6.44855	N
1260	543864523	1105.4	1860.85	0.547987	5.89992	N
210	543853334	1538.4	1651.84	0.548142	5.89904	N
243	543854321	1354.7	1434.61	0.54828	6.75317	N
1298	543864642	925.3	1897.95	0.548482	6.05707	N
1083	543874502	1796.7	1398.77	0.548676	6.32369	N
115	543853183	1529.8	1434.49	0.549706	6.59213	N
358	543854512	1198.9	6340.01	0.549893	7.78827	N
225	543853373	1356.7	1382.73	0.550335	6.98961	N
1227	543864421	904.6	2032.29	0.55062	5.85922	N
484	543854742	1066.8	1258.53	0.551185	7.77441	N
636	543863092	949.9	1801.08	0.551355	6.37669	N
1295	543864633	1110.7	1502.12	0.551899	7.00582	N
100	543853144	1740.8	1397.56	0.552162	6.53648	N
919	543874013	1398.6	1738.43	0.552295	6.01217	N
264	543853422	1875.4	1702.28	0.552319	5.51043	N
428	543854643	1096	6233.05	0.552507	7.67273	N
549	543853912	1359.3	1561.1	0.552735	6.55911	N
913	543874001	1327.4	1693.87	0.553318	6.26074	N
132	543854124	1525.2	1488.97	0.553706	6.59636	N
1180	543864234	875.3	1849.85	0.55448	6.47785	N
638	543863094	1003.2	1952.57	0.554786	6.08223	N
204	543853322	1702.8	1490.92	0.555123	6.42352	N
1079	543873592	1563.3	1636.84	0.555293	6.19542	N
754	543863481	1235.3	1786.88	0.555348	6.2165	N
538	543854832	1054.6	5899.82	0.555708	6.87439	N
320	543854463	1151.4	1250.41	0.556068	7.89219	N
833	543863784	1322	1473.27	0.556089	6.99304	N
332	543853544	1363.7	1786.41	0.556094	6.08557	N
517	543853881	1082.2	2069.24	0.556493	5.79005	N
1223	543864411	1064.7	1768.89	0.556515	6.52334	N
345	543853581	1212.6	1561.19	0.556574	6.90005	N
1203	543864333	929.2	2202.08	0.557085	5.72995	N
1052	543873484	1469.1	1825.96	0.557315	5.90229	N
1319	543864714	1128.4	2086.2	0.557811	5.74883	N
19	543843962	1919.6	1583.24	0.557833	6.00038	N
292	543853492	1296.1	1478.09	0.558157	7.09601	N
1289	543864621	1138.1	1969.89	0.558307	6.01475	N
250	543854334	1266	1389.85	0.558372	7.40347	N
674	543863224	1795.3	1797.71	0.558646	5.61715	N
579	543853991	994.3	1934.43	0.559257	6.31473	N
430	543854651	1100.9	6227.5	0.559301	7.92368	N
700	543863292	1019.5	1918.08	0.559958	6.35047	N
1029	543874301	1668.1	1848.8	0.56072	5.73492	N
1377	543864921	1352.8	1739.9	0.561541	6.43703	N
777	543863571	1308.7	1698.96	0.561868	6.61237	N
1306	543864662	746.4	2244.74	0.56204	6.07416	N
1199	543864323	895.9	2333.19	0.562139	5.72251	N
472	543854712	1110.7	1417.31	0.562578	7.68591	N
1267	543864542	787	2284.39	0.563235	5.99538	N
1060	543874404	1786.1	1499.26	0.563317	6.62706	N
810	543863691	1187.3	2065.47	0.563582	5.95226	N
1121	543864002	958.9	1906.91	0.563903	6.61293	N
1205	543864341	872.1	1598.07	0.563949	7.51937	N
642	543863124	1625	1771.93	0.564587	6.13641	N
622	543863054	1327.9	1825.26	0.56533	6.40501	N
301	543854413	1223.4	6042.19	0.565694	7.46972	N
1271	543864552	747.2	2163.43	0.566047	6.3986	N
1116	543874702	1839.2	1799.67	0.566068	5.85869	N
980	543873254	1767.2	1855.4	0.566083	5.8093	N
253	543854343	1246.7	1341.34	0.566456	7.90349	N
518	543853882	1047	2265.61	0.566826	5.84985	N
677	543863233	1870.2	1923.01	0.566907	5.55335	N
1364	543864853	1043.3	1811.1	0.566939	6.86268	N
1124	543864011	960.3	1958.83	0.566964	6.61333	N
1376	543864914	1306.7	1994.35	0.566978	6.0979	N
1155	543864131	941.1	1885.57	0.56705	6.81317	N
1028	543873394	1677.7	1722.34	0.567258	6.30748	N
859	543863891	1182.9	2363.53	0.567589	5.53058	N
307	543854431	1240.6	5966.78	0.567595	7.30568	N
1165	543864201	978.1	1709.72	0.567665	7.23423	N
1264	543864533	1087.5	1905.41	0.568092	6.62421	N
176	543853294	1428	1663.88	0.568703	6.83345	N
556	543853932	1336.2	1784.72	0.568786	6.63578	N
371	543854543	1146.4	6047.78	0.569056	7.71453	N
1365	543864854	1029.8	1821.29	0.569164	6.94465	N
1239	543864451	807.9	2216.52	0.569776	6.36615	N
395	543853662	1258	1758.92	0.569808	6.84062	N
2	543843873	1978.1	1704.04	0.569874	6.08616	N
1147	543864111	897.5	2199.13	0.570601	6.32003	N
829	543863774	1436.1	1740.12	0.570715	6.70288	N
256	543854352	1228.5	6066.77	0.570753	7.73733	N
341	543853571	1257.3	1666.81	0.570761	7.12408	N
304	543854422	1239.2	1666.33	0.571119	7.16127	N
1168	543864204	1029.2	2171.01	0.571264	6.23897	N
998	543874202	1565.8	2135.11	0.571402	5.64458	N
403	543853682	1152.4	1684.22	0.571856	7.25264	N
1082	543874501	1676.4	1819.45	0.571873	6.24837	N
1266	543864541	853.6	2303.74	0.574177	6.31833	N
1186	543864253	858.5	2305.56	0.574603	6.32558	N
1279	543864573	722.1	2601.68	0.575036	6.0193	N
1363	543864852	1014.9	2069.28	0.575092	6.62601	N
630	543863074	1150.7	1786.96	0.575342	7.12888	N
459	543853781	1125.9	1942.6	0.576103	6.81382	N
1143	543864101	987.2	1982.7	0.576869	6.92584	N
364	543854524	1158.7	5889.81	0.579033	7.65977	N
1337	543864762	909.4	2695.07	0.579703	5.84084	N
180	543854204	1385	2101.24	0.579747	6.28247	N
589	543854913	991	2208.39	0.579794	6.55854	N
1270	543864551	766.7	2635.01	0.579821	6.10733	N
1300	543864644	934.8	2412.63	0.58	6.25669	N
178	543854202	1458.7	2219.29	0.580152	5.9647	N
1194	543864312	1029.7	2659.02	0.580702	5.77956	N
1200	543864324	986.2	2972.72	0.581334	5.48163	N
507	543853853	1195.1	2069.54	0.581342	6.65261	N
837	543863794	1116.2	2744.05	0.582076	5.61169	N
665	543863183	1142.9	1883.02	0.582205	7.18093	N
548	543854854	1009.6	5486.56	0.582406	6.99123	N
944	543873164	1537.1	2177.86	0.582839	6.05721	N
1268	543864543	882.8	2672.26	0.582916	6.0348	N
1130	543864023	933.8	2161.91	0.582966	6.85299	N
1201	543864331	830.3	2789.86	0.582975	5.94676	N
957	543874101	1418.8	2175.14	0.583058	6.22203	N
62	543853083	1801.5	2054.58	0.583187	6.00487	N
1012	543873352	1797.7	2109.89	0.583229	5.88903	N
1202	543864332	844.6	2692.18	0.58381	6.09434	N
1229	543864423	974.4	2789.46	0.58396	5.80827	N
1208	543864344	830.4	2470.91	0.584171	6.4599	N
1350	543864821	1242.3	2293.14	0.584205	6.25867	N
651	543863151	1441.9	2188.07	0.58428	6.21703	N
1159	543864141	928.1	2326.12	0.584585	6.60695	N
205	543853323	1802.9	2203.59	0.585632	5.78776	N
1274	543864561	735.2	2590.23	0.585663	6.45245	N
1204	543864334	796.5	2395.36	0.585882	6.70035	N
338	543853562	1274.5	1921.21	0.586311	7.09251	N
155	543853243	1798.7	2356.28	0.586564	5.54207	N
515	543853873	1124.6	1996.31	0.586722	7.12414	N
580	543853992	984.5	2246.22	0.586983	6.78637	N
827	543863772	1404.7	2042.42	0.587029	6.68199	N
607	543863021	1433.8	2032.62	0.587462	6.68438	N
330	543853542	1362.8	2189.24	0.588311	6.47682	N
1384	543864934	1198.8	2453.72	0.588493	6.20171	N
831	543863782	1297	2279.62	0.588865	6.40533	N
601	543854943	978.6	2357.25	0.589019	6.6682	N
123	543854103	1560.1	2421.18	0.589022	5.82673	N
468	543854702	1083.8	5603.25	0.589131	7.43935	N
926	543874032	1284.5	2493.74	0.589627	6.07646	N
239	543854311	1348.1	2148.27	0.589646	6.63418	N
661	543863173	1204.8	2097.12	0.59016	6.94253	N
652	543863152	1348.2	2264.19	0.590445	6.43623	N
557	543853933	1410.7	2179.15	0.590632	6.53295	N
600	543854942	994.7	1984.67	0.590931	7.48659	N
834	543863791	1232.7	5058.19	0.591068	6.23881	N
308	543854432	1235.4	5679.6	0.591087	7.51229	N
847	543863861	1659.4	1696.52	0.591373	7.38066	N
1104	543874602	1702.8	2263.36	0.591531	6.03719	N
781	543863581	1269.4	1679.1	0.591951	7.93938	N
611	543863031	1468.3	2217.12	0.592307	6.45282	N
1150	543864114	897.2	2545.51	0.593177	6.62439	N
196	543854244	1295	1923.07	0.593349	7.35053	N
1085	543874504	1756.3	2388.22	0.593987	5.8445	N
1354	543864831	1174.9	2386.67	0.594209	6.58156	N
1273	543864554	758.6	3166.26	0.594257	6.12191	N
1232	543864432	846.6	3180.7	0.594687	6.01766	N
832	543863783	1366.8	2152.76	0.594721	6.80978	N
631	543863081	1131.4	2500.17	0.594756	6.46696	N
249	543854333	1279.2	5470.61	0.594841	7.12738	N
916	543874004	1415.7	2420.22	0.595168	6.26219	N
160	543853254	1551.8	2258.63	0.595205	6.38735	N
1309	543864671	757.1	2885.07	0.595253	6.43202	N
688	543863262	1274.2	2266.05	0.595607	6.73684	N
654	543863154	1349.2	2269.34	0.595696	6.63962	N
496	543853824	1331.6	2339.82	0.595859	6.53725	N
124	543854104	1566.9	2623.91	0.596055	5.78505	N
235	543854301	1354.9	2207.87	0.596155	6.77245	N
836	543863793	1254.1	2660.35	0.596837	6.15676	N
960	543874104	1492.1	2526.03	0.597214	6.07507	N
725	543863382	1115.8	2777.03	0.597367	6.19541	N
835	543863792	1132	3160.97	0.597882	5.80659	N
1326	543864733	1147.1	2325.94	0.597925	6.87964	N
1241	543864453	810.7	2591.64	0.598012	6.86398	N
241	543854313	1290.2	5398.5	0.598065	7.0948	N
1275	543864562	748.3	2964.92	0.598091	6.47381	N
1261	543864524	1091.2	2522.19	0.5983	6.62927	N
540	543854834	1028.5	5116.33	0.598759	6.91042	N
1347	543864812	1151.1	2897.93	0.599005	6.07541	N
96	543853134	1699	2191.55	0.599147	6.49723	N
478	543854724	1095	5495.83	0.599212	7.59453	N
1221	543864403	1021.1	2409.61	0.599278	6.94437	N
670	543863194	1036.7	2657.61	0.599348	6.53743	N
187	543854223	1397.6	2306.66	0.599471	6.66499	N
1277	543864564	725	4270.76	0.599524	6.31758	N
1182	543864242	909.7	2840.38	0.599586	6.47049	N
177	543854201	1476.7	2490.11	0.599881	6.26201	N
731	543863394	1075.8	4315.3	0.600065	5.92904	N
596	543854932	1011	5284.84	0.600071	7.29612	N
269	543853433	1748.7	2581.78	0.600113	5.78839	N
405	543853684	1127	2214.88	0.600229	7.21248	N
357	543854511	1193.1	5572.61	0.600276	7.69157	N
1263	543864532	947.5	4151.96	0.600815	6.02273	N
368	543854534	1152.1	5507.65	0.600932	7.61923	N
983	543873263	1672.5	2547.2	0.601402	5.98845	N
577	543853983	1143.6	2464.23	0.601678	6.79755	N
545	543854851	1028.2	2521.45	0.602191	6.87039	N
1206	543864342	852.8	2932.65	0.602426	6.55534	N
1136	543864041	962.9	3257.57	0.602627	6.14672	N
319	543854461	1170.4	1924.08	0.602926	7.9021	N
701	543863293	1062	2910.75	0.604089	6.38455	N
285	543853473	1292.8	2251.49	0.604173	7.09769	N
1125	543864012	968.5	2710.81	0.604331	6.7562	N
918	543874012	1340.4	2716.23	0.604824	6.30195	N
335	543853553	1305	2544.7	0.605427	6.61951	N
1236	543864442	803.2	3271.38	0.605475	6.45797	N
691	543863271	1213.1	2505.73	0.60549	6.79967	N
1105	543874603	1807.1	2369.36	0.60583	6.3014	N
151	543853233	1675.8	2691.46	0.60653	5.98699	N
527	543854803	1018.2	2181.81	0.606904	7.6935	N
1107	543874611	1778.2	2711.99	0.607235	5.86006	N
1382	543864932	1163	2768.32	0.607796	6.57935	N
22	543843972	1919	2111.92	0.608168	6.76068	N
1237	543864443	795.4	3740.1	0.608262	6.42719	N
541	543854841	1036.9	5135.58	0.608402	7.33326	N
693	543863273	1237.6	2489.9	0.60851	6.92035	N
159	543853253	1627.1	2777.65	0.608544	6.01804	N
982	543873262	1593	2614.21	0.608622	6.28734	N
1323	543864724	1159.6	3259	0.608672	6.14905	N
1123	543864004	918.8	2432.85	0.608828	7.43017	N
462	543853784	1082.9	2910.71	0.608891	6.55779	N
359	543854513	1167.9	5311.05	0.608929	7.51989	N
606	543854954	985.4	2455.38	0.609257	7.32597	N
1145	543864103	972.9	3198.51	0.609425	6.45662	N
1327	543864734	1087.9	2831.58	0.609876	6.68295	N
658	543863164	1263.8	2854.88	0.610161	6.44612	N
500	543853834	1284.4	2769.02	0.61034	6.53183	N
1281	543864601	1099.5	2884.88	0.610519	6.6338	N
1161	543864143	903.7	2766.19	0.611109	7.04651	N
729	543863392	1025	2565.37	0.611559	7.19509	N
271	543853441	1464.4	3299.87	0.611607	5.86435	N
1140	543864051	971.6	2586.93	0.612047	7.25052	N
558	543853934	1386.7	2882.45	0.612518	6.35846	N
1179	543864233	815	4157.06	0.612618	6.68154	N
587	543854911	1014	2956.05	0.61297	6.76694	N
553	543853923	1409.3	2341.86	0.613317	7.16157	N
202	543854263	1244.4	2394.82	0.613622	7.28699	N
238	543854304	1287.1	5042.46	0.613705	7.08331	N
780	543863574	1330.9	2833.82	0.613725	6.53543	N
474	543854714	1090.7	2440.54	0.613776	7.40767	N
1329	543864742	948.2	3659.69	0.613914	6.47741	N
384	543853633	1401.5	2713.67	0.614479	6.63148	N
1330	543864743	1010.5	3904.93	0.614929	6.44755	N
513	543853871	1099	2928.11	0.615004	6.77366	N
297	543854403	1237.6	2622.68	0.615244	6.99772	N
813	543863694	1133.5	3418.95	0.615319	6.37337	N
510	543853862	1121.4	4840.68	0.615473	7.06059	N
525	543854801	1030.6	2386.43	0.615528	7.65027	N
582	543853994	952.8	3125.07	0.615738	6.8026	N
598	543854934	1006.9	5151.72	0.61595	7.71562	N
779	543863573	1377.9	2690.46	0.615955	6.75407	N
1142	543864053	958.9	2945.66	0.615995	6.97352	N
1055	543873493	1512	2501.29	0.61601	6.8718	N
849	543863863	1656	2108.6	0.616171	7.4317	N
1322	543864723	1205.9	3363.09	0.616336	6.35234	N
207	543853331	1597.6	3030.42	0.616703	6.11561	N
566	543853954	1250.9	3049.48	0.616751	6.53642	N
543	543854843	1016.8	4863.87	0.616893	7.28412	N
1296	543864634	1098.1	3130.79	0.617028	6.66977	N
113	543853181	1660.2	3613.31	0.617039	5.72777	N
605	543854953	981.5	2714.4	0.617237	7.27362	N
1153	543864123	850.4	4257.76	0.617358	6.89369	N
1138	543864043	949.4	3600.4	0.617387	6.63216	N
232	543853392	1374.8	2638.41	0.617608	6.90063	N
1162	543864144	935	2981.32	0.617828	7.0451	N
470	543854704	1065.4	2470.01	0.618217	7.57689	N
394	543853661	1280.7	2326.32	0.618484	7.5682	N
958	543874102	1497.8	3054.51	0.618921	6.3148	N
585	543854903	981.6	2897.77	0.619173	7.13062	N
620	543863052	1288.6	3242.04	0.61938	6.44698	N
593	543854923	1011.9	3145.23	0.619479	6.86984	N
1371	543864903	1292.4	3156.31	0.619632	6.51487	N
544	543854844	1015.4	2722.49	0.619771	7.32755	N
562	543853944	1336.8	2963.34	0.62041	6.66586	N
415	543854612	1156.2	5082.4	0.620696	7.60849	N
23	543843973	1878.1	2485.67	0.620745	6.63759	N
1387	543864943	1147	3709.63	0.621188	6.5279	N
1120	543864001	952.7	3659.78	0.621196	6.77906	N
392	543853653	1249.8	2979.68	0.621736	6.81464	N
407	543853692	1164.3	3250.87	0.621938	6.70399	N
309	543854433	1204.4	4869	0.622264	7.28059	N
482	543854734	1071.2	3828.72	0.622353	6.67385	N
1238	543864444	758.1	3221.65	0.622396	7.25542	N
531	543854813	1038.2	3210.15	0.622999	6.93664	N
274	543853444	1391.9	3350.06	0.623332	6.41965	N
1235	543864441	777.6	3911.78	0.623394	7.09879	N
296	543854402	1252.5	2793.75	0.62367	7.10252	N
971	543874133	1488.1	3000.28	0.623843	6.58375	N
450	543853754	1175.3	2613.9	0.624253	7.4675	N
191	543854233	1363.6	2720.83	0.624574	7.09453	N
463	543853791	1100	2874.74	0.624582	7.23503	N
486	543854744	1047.4	2762.74	0.624865	7.44941	N
316	543854452	1180.8	5105.52	0.625171	7.80541	N
805	543863674	1397.3	2856.74	0.625176	6.90788	N
542	543854842	1031.4	4448.21	0.62518	7.14036	N
535	543854823	1053.7	3021.15	0.625715	7.18914	N
599	543854941	995.2	4193.81	0.625779	7.02996	N
489	543854753	1043.1	3150.42	0.62606	7.10444	N
418	543854621	1147.3	4670.11	0.626373	7.27182	N
534	543854822	1073.9	2596.18	0.626463	7.71566	N
537	543854831	1064	3487.41	0.626505	6.90497	N
299	543854411	1254.7	4934.02	0.626913	7.5132	N
469	543854703	1051.8	2898.16	0.627214	7.3816	N
539	543854833	1039.3	3176.79	0.627349	7.14349	N
340	543853564	1243.5	2893.28	0.627416	7.15421	N
236	543854302	1334.8	4296.5	0.627434	6.73775	N
623	543863061	1220.2	3319.46	0.627525	6.82925	N
153	543853241	1681.1	3223.02	0.627644	6.31834	N
514	543853872	1095.6	3094.4	0.627898	7.1612	N
804	543863673	1455.6	2853.85	0.627996	6.95794	N
536	543854824	1057.2	2704.64	0.628128	7.65287	N
1106	543874604	1758.1	4478.76	0.628372	6.39345	N
728	543863391	1069.4	3812.02	0.628835	6.94845	N
508	543853854	1163	3858.27	0.629293	6.8553	N
404	543853683	1136.1	2976.25	0.629409	7.28614	N
21	543843971	1890.9	2432.27	0.629436	7.07926	N
546	543854852	1025.9	3171.52	0.629501	7.25632	N
570	543853964	1172.3	3775.19	0.629778	6.85881	N
1181	543864241	885.6	3471.17	0.629826	7.2762	N
306	543854424	1205.7	2764.86	0.629904	7.46195	N
244	543854322	1342.6	4603.67	0.630045	7.10727	N
588	543854912	1024	4063.53	0.63006	7.11536	N
361	543854521	1187.7	3094.41	0.630364	7.15267	N
1389	543864951	1063.1	3678.36	0.630625	7.03654	N
144	543854154	1309.8	4899.21	0.630693	7.55051	N
302	543854414	1224.8	4865.22	0.630863	7.6188	N
594	543854924	1032.3	3944.75	0.630884	7.1034	N
376	543854554	1113.3	2436.07	0.630913	8.11046	N
150	543853232	1636.1	4008.98	0.63133	6.38209	N
629	543863073	1194.7	3835.23	0.631345	6.90063	N
624	543863062	1213	3501.09	0.63157	6.92871	N
530	543854812	1070.7	3101.79	0.63197	7.3613	N
778	543863572	1288.1	3694.12	0.632049	6.81285	N
628	543863072	1172.2	3310.35	0.632324	7.10021	N
188	543854224	1373.6	4377.46	0.632934	6.98302	N
532	543854814	1045.9	3347.11	0.633092	7.27066	N
662	543863174	1166.4	3301.07	0.633266	7.15251	N
602	543854944	979.8	3408.74	0.634202	7.37097	N
586	543854904	993.5	3947.83	0.634503	7.30739	N
487	543854751	1060	3146.48	0.6349	7.46243	N
3	543843874	1967	3025.4	0.635871	6.47411	N
485	543854743	1058.3	4077.71	0.635877	7.32577	N
363	543854523	1160.7	2861.83	0.635994	7.66061	N
1219	543864401	1001.4	4631.36	0.636347	7.83634	N
310	543854434	1206.7	4698.6	0.636377	7.65774	N
522	543853892	1037.7	3294.23	0.636401	7.45284	N
406	543853691	1155.8	3773.28	0.637337	7.20177	N
247	543854331	1322	4371.51	0.63734	7.23019	N
803	543863672	1381	3751.23	0.637872	6.94348	N
592	543854922	1042.3	3393.1	0.638606	7.48882	N
420	543854623	1136	4486.89	0.639216	7.64513	N
529	543854811	1061.2	3020.63	0.639229	7.75799	N
396	543853663	1261	3894.81	0.639434	7.17251	N
300	543854412	1256	3701.56	0.639807	7.18801	N
294	543853494	1261.2	3887.12	0.639965	7.19509	N
466	543853794	1061.9	3794.99	0.640081	7.4401	N
414	543854611	1143.3	4409.63	0.640206	7.61119	N
511	543853863	1131.2	3340.45	0.64255	7.57359	N
512	543853864	1117.7	4292.79	0.642656	7.65919	N
528	543854804	1033.9	4447.32	0.642708	7.88744	N
143	543854153	1332.1	3189.5	0.642948	7.43472	N
660	543863172	1167.6	3418.02	0.643337	7.52354	N
366	543854532	1178.8	4556.87	0.643816	7.85603	N
259	543854361	1218.2	4326.08	0.644109	7.61947	N
471	543854711	1103.1	3484.43	0.644765	7.64121	N
584	543854902	1016.5	3609.58	0.644801	7.71659	N
362	543854522	1178.7	3946.54	0.64506	7.5299	N
417	543854614	1131	3643.64	0.647102	7.66649	N
526	543854802	1048.4	4078.46	0.648075	7.86657	N
260	543854363	1193	4065.83	0.648151	7.68305	N
432	543854653	1082.8	3724.69	0.650775	7.87822	N
360	543854514	1176.3	4109.25	0.653856	7.9724	N
1191	543864303	990	3365.23	0.661971	8.59191	N
N	386	1208.07	2873.94	0.596876	6.76006

## Sheet: Sheet2
Grids		Disease_Potential	Road	TWI	elevation
Occurrence	170	0.612536	3092.51	7.00582	1170.79
Not confirm-over threshold	386	0.596876	2873.94	6.76006	1208.07
> #####2群間の平均値の比較(t検定)#####
> (res <- t.test(elevation~factor(Disease_occurrence),
+ alternative='two.sided', conf.level=0.95, var.equal=TRUE, data=Dataset))
	Two Sample t-test
data: elevation by factor(Disease_occurrence)
t = 1.7186, df = 554, p-value = 0.08625
alternative hypothesis: true difference in means is not equal to 0
95 percent confidence interval:
-5.329022 79.894187
sample estimates:
mean in group N mean in group Y
1208.068 1170.785
> summary.ttest
mean sd p.value
Disease_occurrence=N 1208.068 269.1479 0.0862
Disease_occurrence=Y 1170.785 130.5571
> #####2群間の平均値の比較(t検定)#####
> (res <- t.test(Disease_Potential~factor(Disease_occurrence),
+ alternative='two.sided', conf.level=0.95, var.equal=TRUE, data=Dataset))
	Two Sample t-test
data: Disease_Potential by factor(Disease_occurrence)
t = -6.0087, df = 554, p-value = 3.391e-09
alternative hypothesis: true difference in means is not equal to 0
95 percent confidence interval:
-0.02077887 -0.01054053
sample estimates:
mean in group N mean in group Y
0.5968763 0.6125360
> summary.ttest
mean sd p.value
Disease_occurrence=N 0.5968763 0.02905845 3.39e-09
Disease_occurrence=Y 0.6125360 0.02653592
> #####2群間の平均値の比較(t検定)#####
> (res <- t.test(Road~factor(Disease_occurrence), alternative='two.sided',
+ conf.level=0.95, var.equal=TRUE, data=Dataset))
	Two Sample t-test
data: Road by factor(Disease_occurrence)
t = -2.2175, df = 554, p-value = 0.02699
alternative hypothesis: true difference in means is not equal to 0
95 percent confidence interval:
-412.18105 -24.96579
sample estimates:
mean in group N mean in group Y
2873.938 3092.512
> summary.ttest
mean sd p.value
Disease_occurrence=N 2873.938 1120.9368 0.027
Disease_occurrence=Y 3092.512 946.6917
> #####2群間の平均値の比較(t検定)#####
> (res <- t.test(TWI~factor(Disease_occurrence), alternative='two.sided',
+ conf.level=0.95, var.equal=TRUE, data=Dataset))
	Two Sample t-test
data: TWI by factor(Disease_occurrence)
t = -4.8128, df = 554, p-value = 1.922e-06
alternative hypothesis: true difference in means is not equal to 0
95 percent confidence interval:
-0.3460536 -0.1454550
sample estimates:
mean in group N mean in group Y
6.760064 7.005818
> summary.ttest
mean sd p.value
Disease_occurrence=N 6.760064 0.6065909 1.92e-06
Disease_occurrence=Y 7.005818 0.4129375
